# Supplementary material
Source: publisher figshare collection journal article supplement (https://tandf.figshare.com/ndownloader/files/13772477)
Supplement: Supplementary file 1 [file 13772477]

**Supporting Information**

**Unexpected Formation of 4,5-Dihydro-1*H*-pyrazolo[3,4-*b*]pyridine Derivatives as a Potent Antitubercular Agents and its Evaluation by Green Chemistry Metrics**

D. K. Jamale1,S. S. Vibhute1, S. S. Undare2, N. J. Valekar3, K. T. Patil4, P. P. Warekar4, P. T. Patil4, G. B. Kolekar3 and P. V. Anbhule*3

1. Chemistry Research Laboratory, Department of Chemistry, Shri Shivaji Mahavidyalaya, Barshi, Dist. Solapur, Maharashtra, India
2. Department of Chemistry, Balbhim College of Arts, Science & Commerce, Beed, Dist. Beed, Maharashtra, India.
3. Medicinal Chemistry Research Laboratory, Department of Chemistry, Shivaji University, Kolhapur, Maharashtra, India.
4. Department of Agrochemicals and Pest Management, Shivaji University, Kolhapur, Maharashtra, India.

*Corresponding Author E-mail: pvanbhule@gmail.com

Tel.: +91 231 260 9162; fax: +91 231 2692333

**Index**

| **Sr. No.** | **Contents** | **Page No.** |
| --- | --- | --- |
|  | Spectral data of the synthesized compounds | 2-7 |
|  | Scanned copies of 1H NMR and 13C NMR, FT-IR and HRMS of synthesized compounds | 8-31 |

**Spectral data of the synthesized compounds**

**6-amino-4-(2-nitrophenyl)-3-methyl-1-phenyl-4,5-dihydro-1H-pyrazolo[3,4-b]pyridine-5-carbonitrile (Table 2, Entry 1, 4a):** White solid, Yield: 89 %, mp: 172 °C, 1H NMR (400 MHz, CDCl3): δ (ppm) = 2.08 (s, 3H, CH3), 3.68 (s, 2H, NH2, exchanged for D2O), 4.69-4.71 (d, J=8 Hz, 1H, benzylic -CH), 5.48-5.50 (d, J=8 Hz, 1H, -CH), 7.35-7.40 (t, 1H, ArH), 7.40-7.49 (m, 4H, ArH), 7.54-7.59 (m, 1H, ArH), 7.70-7.74 (t, 2H, ArH), 7.94-7.96 (d, 1H, ArH); 13C NMR (100 MHz, CDCl3): 13.05, 26.88, 38.41, 98.54, 112.08, 112.13, 124.77, 126.22, 128.18, 128.20, 129.60, 129.65, 131.10, 133.29, 137.60, 143.03, 147.39, 149.23; IR (KBr): 3401, 3300, 3210, 2976, 2833, 2253, 1624, 1560, 1519, 1495, 1360, 1299, 1019, 919, 835, 784, 736, 649, 605 cm-1; HRMS m/z (ESI) : 373.1410 [M]+; Anal. Calcd for C20H16N6O2 (%): C (64.51), H (4.33), N (22.57); Found: C (64.42), H (4.37), N (22.64). [Figure S1-a, S1-b, S2-b, S2-b, S3 and S4]

**6-amino-4-(4-chlorophenyl)-3-methyl-1-phenyl-4,5-dihydro-1H-pyrazolo[3,4-b]pyridine-5-carbonitrile (Table 2, Entry 2, 4b):** White solid, Yield: 96 %, mp: 176 °C, 1H NMR (400 MHz, CDCl3): δ (ppm) = 2.26 (s, 3H, CH3), 3.51 (s, 2H, NH2), 4.66 (s, 2H, -CH, benzylic –CH), 7.28 (s, 2H, ArH), 7.34-7.52 (m, 7H, ArH); 13C NMR (100 MHz, CDCl3): 12.96, 26.94, 42.19, 100.33, 112.37, 112.42, 124.61, 128.10, 128.60, 129.56, 129.67, 134.45, 134.61, 137.67, 142.34, 147.42; IR (KBr): 3363, 2818, 2253, 1620, 1597, 1493, 1455, 1318, 1210, 919, 894, 761, 700, 688, 647 cm-1; HRMS m/z (ESI) : 362.1172 [M]+;Anal. Calcd for C20H15Cl2N5 (%): C (66.39), H (4.46), N (19.36); Found: C (66.45), H (4.42), N (19.40). [Figure S5, S6, S7 and S8]

**6-amino-4-(4-bromophenyl)-3-methyl-1-phenyl-4,5-dihydro-1H-pyrazolo[3,4-b]pyridine-5-carbonitrile (Table 2, Entry 3, 4c):** Faint yellow solid, Yield: 92 %, mp: 166 °C, 1H NMR (400 MHz, CDCl3): δ (ppm) = 2.25 (s, 3H, CH3), 3.51 (s, 2H, NH2), 4.62-4.64 (d, J=8 Hz, 1H, benzylic -CH), 4.65-4.67 (d, J=8 Hz, 1H, -CH), 7.28-7.30 (d, J=8 Hz, 2H, ArH), 7.47-7.50 (m, 5H, ArH), 7.58-7.60 (d, J=8 Hz, 2H, ArH); 13C NMR (100 MHz, CDCl3): 12.96, 26.85, 42.26, 100.27, 112.34, 112.39, 122.53, 124.61, 128.10, 128.89, 129.67, 132.52, 135.14, 137.67, 142.32, 147.41; IR (KBr): 3363, 2971, 2815, 2251, 1619, 1597, 1566, 1489, 1454, 1317, 1107, 1008, 918, 893, 719, 698, 668, 614 cm-1; HRMS m/z (ESI) : 406.0667 [M**]+;** Anal. Calcd for C20H16BrN5 (%): C (59.13), H (3.97), N (17.24); Found: C (59.21), H (3.94), N (17.29). [Figure S9, S10, S11 and S12]

**6-amino-4-(2,4-dichlorophenyl)-3-methyl-1-phenyl-4,5-dihydro-1H-pyrazolo[3,4-b] pyridine-5-carbonitrile (Table 2, Entry 4, 4d):** White solid, Yield: 95 %, mp: 178 °C, 1H NMR (400 MHz, CDCl3): δ (ppm) = 2.25 (s, 3H, CH3), 3.60 (s, 2H, NH2), 4.66-4.68 (d, J=8 Hz, 1H, benzylic -CH), 4.94-4.96 (d, J=8 Hz, 1H, -CH), 7.28-7.54 (m, 8H, ArH); 13C NMR (100 MHz, CDCl3): 13.10, 26.51, 39.75, 98.45, 112.01, 112.19, 124.68, 127.60, 128.08, 128.13, 129.67, 130.93, 132.52, 134.97, 135.12, 137.62, 142.50, 147.70; IR (KBr): 3336, 2830, 2252, 1621, 1589, 1495, 1452, 1316, 1108, 917, 889, 791, 759, 696, 666 cm-1; HRMS m/z (ESI) : 396.0783 [M**]+;** Anal. Calcd for C20H15Cl2N5 (%): C (60.62), H (3.82), N (17.67); Found: C (60.71), H (3.85), N (17.69). [Figure S13, S14, S15 and S16]

**6-amino-3-methyl-1,4-diphenyl-4,5-dihydro-1H-pyrazolo[3,4-b]pyridine-5-carbonitrile (Table 2, Entry 5, 4e):** Yellowish solid, Yield: 86 %, mp: 74 °C, 1H NMR (400 MHz, CDCl3): δ (ppm) = 2.28 (s, 3H, CH3), 3.50 (s, 2H, NH2), 4.68 (s, 2H, -CH, benzylic -CH), 7.28-7.48 (m, 10H, ArH); 13C NMR (100 MHz, CDCl3): 12.92, 26.81, 42.46, 100.32, 112.66, 112.72, 124.51, 127.14, 127.92, 128.37, 129.36, 129.61, 136.06, 137.78, 142.65, 147.58; IR (KBr): 3348, 2977, 2254, 1616, 1561, 1496, 1393, 1317, 1159, 1072, 1012, 915, 761, 737, 695, 648 cm-1; Anal. Calcd for C20H17N5 (%): C (73.37), H (5.23), N (21.39); Found: C (73.45), H (5.26), N (21.42). [Figure S17, S18 and S19]

**6-amino-4-(3-nitrophenyl)-3-methyl-1-phenyl-4,5-dihydro-1H-pyrazolo[3,4-b]pyridine-5-carbonitrile (Table 2, Entry 6, 4f):** Faint orange solid, Yield: 91 %, mp: 90 °C, 1H NMR (400 MHz, CDCl3): δ (ppm) = 2.21 (s, 3H, CH3), 3.64 (s, 2H, NH2), 4.74-4.76 (d, J=8 Hz, 1H, benzylic -CH), 4.84-4.86 (d, J=8 Hz, 1H, -CH), 7.28 (s, 1H, ArH), 7.39-7.53 (m, 4H, ArH), 7.64-7.66 (d, J=8 Hz, 1H, ArH), 7.66-7.68 (d, J=8 Hz, 1H, ArH), 8.24-8.26 (d, J=8 Hz, 2H, ArH); 13C NMR (100 MHz, CDCl3): 13.09, 26.99, 42.44, 100.17, 112.24, 112.27, 122.45, 123.44, 124.72, 128.30, 129.73, 130.42, 133.48, 137.50, 138.60, 142.46, 147.34, 148.68; Anal. Calcd for C20H16N6O2 (%): C (64.51), H (4.33), N (22.57); Found: C (64.45), H (4.36), N (22.61). [Figure S20 and S21]

**6-amino-4-(3-chlorophenyl)-3-methyl-1-phenyl-4,5-dihydro-1H-pyrazolo[3,4-b]pyridine-5-carbonitrile (Table 2, Entry 7, 4g):** Yellowish solid, Yield: 92 %, mp: 96 °C, 1H NMR (400 MHz, CDCl3): δ (ppm) = 2.24 (s, 3H, CH3), 3.57 (s, 2H, NH2), 4.61-4.63 (d, J=8 Hz, 1H, benzylic -CH), 4.69-4.71 (d, J=8 Hz, 1H, -CH), 7.28 (s, 1H, ArH), 7.30-7.32 (d, J=8 Hz, 2H, ArH), 7.35-7.47 (m, 4H, ArH), 7.49-7.51 (d, J=8 Hz, 2H, ArH); 13C NMR (100 MHz, CDCl3): 12.95, 26.81, 42.24, 100.08, 112.40, 112.43, 124.62, 125.06, 127.75, 128.15, 128.71, 129.68, 130.53, 135.40, 137.56, 138.20, 142.56, 147.50; IR (KBr): 3348, 2971, 2254, 1634, 1567, 1517, 1454, 1394, 1350, 1164, 1073, 1023, 952, 761, 726, 696, 648 cm-1; Anal. Calcd for C20H16ClN5 (%): C (66.39), H (4.46), N (19.36); Found: C (66.26), H (4.41), N (19.31). [Figure S22, S23 and S24]

**6-amino-4-(3,4-dichlorophenyl)-3-methyl-1-phenyl-4,5-dihydro-1*H*-pyrazolo[3,4-*b*] pyridine-5-carbonitrile (Table 2, Entry 8, 4h):** Yellow orange solid, Yield: 91 %, mp: 96 °C, 1H NMR (400 MHz, CDCl3): δ (ppm) = 2.23 (s, 3H, CH3), 3.59 (s, 2H, NH2), 4.59-4.61 (d, J=8 Hz, 1H, benzylic -CH), 4.68-4.70 (d, J=8 Hz, 1H, -CH), 7.26-7.28 (d, J=8 Hz, 2H, ArH), 7.28-7.50 (m, 4H, ArH), 7.52-7.54 (d, J=8 Hz, 2H, ArH); 13C NMR (100 MHz, CDCl3): 13.02, 26.91, 41.95, 100.07, 112.24, 112.27, 124.67, 126.37, 128.24, 129.56, 129.71, 131.17, 132.85, 133.70, 136.41, 137.53, 142.37, 147.38 ; IR (KBr): 3347, 2971, 2255, 1616, 1564, 1515, 1454, 1394, 1134, 1072, 1030, 951, 761, 696, 647 cm-1; Anal. Calcd for C20H15Cl2N5 (%): C (60.62), H (3.82), N (17.67); Found: C (60.75), H (3.87), N (17.71). [Figure S25, S26 and S27]

**6-amino-4-(4-nitrophenyl)-3-methyl-1-phenyl-4,5-dihydro-1*H*-pyrazolo[3,4-*b*]pyridine-5 -carbonitrile (Table 2, Entry 9, 4i):** Orange solid, Yield: 92 %, mp: 98 °C, 1H NMR (400 MHz, CDCl3): δ (ppm) = 2.22 (s, 3H, CH3), 3.58 (s, 2H, NH2), 4.75-4.77 (d, J=8 Hz, 1H, benzylic -CH), 4.78-4.80 (d, J=8 Hz, 1H, -CH), 7.40-7.47 (m, 3H, ArH), 7.47-7.49 (d, 2H, ArH), 7.51-7.53 (d, 1H, ArH), 7.60-7.62 (d, 1H, ArH), 8.31-8.33 (m, 2H, ArH); 13C NMR (100 MHz, CDCl3): 13.03, 26.78, 42.58, 100.02, 112.13, 112.19, 124.47, 124.68, 128.34, 128.43, 129.75, 137.47, 142.39, 143.41, 147.32, 147.61; IR (KBr): 3347, 2971, 2251, 1596, 1515, 1454, 1394, 1347, 1160, 1072, 1022, 901, 833, 761, 738, 696, 644 cm-1;Anal. Calcd for C20H16N6O2 (%): C (64.51), H (4.33), N (22.57); Found: C (64.47), H (4.35), N (22.65). [Figure S28, S29 and S30]

**6-amino-4-(4-flurophenyl)-3-methyl-1-phenyl-4,5-dihydro-1*H*-pyrazolo[3,4-*b*]pyridine-5 -carbonitrile (Table 2, Entry 10, 4j):** Faint yellowish white solid, Yield: 96 %, mp: 146 °C, 1H NMR (400 MHz, CDCl3): δ (ppm) = 2.25 (s, 3H, CH3), 3.51 (s, 2H, NH2), 4.66 (s, 2H, -CH, benzylic -CH), 7.13-7.52 (m, 9H, ArH); 13C NMR (100 MHz, CDCl3): 12.95, 27.17, 42.13, 100.60, 112.43, 112.47, 116.30, 116.51, 124.61, 128.08, 128.99, 129.07, 129.66, 131.90, 131.94, 137.69, 142.28, 147.41, 161.13, 163.60; IR (KBr): 3360, 2823, 2255, 1621, 1599, 1508, 1455, 1394, 1316, 1163, 1104, 1070, 942, 896, 832, 759, 712, 697, 647 cm-1;Anal. Calcd for C20H16FN5 (%): C (69.55), H (4.67), N (20.28); Found: C (69.64), H (4.69), N (20.24). [Figure S31, S32 and S33]

**6-amino-4-(4-methylphenyl)-3-methyl-1-phenyl-4,5-dihydro-1*H*-pyrazolo[3,4-*b*]pyridine -5-carbonitrile (Table 2, Entry 11, 4k):** Faint yellowish white solid, Yield: 94 %, mp: 130 °C, 1H NMR (400 MHz, CDCl3): δ (ppm) = 2.30 (s, 3H, CH3), 2.35 (s, 3H, CH3), 3.51 (s, 2H, NH2), 4.64 (s, 1H, benzylic -CH), 4.65 (s, 1H, -CH), 7.24-7.52 (m, 9H, ArH); 13C NMR (100 MHz, CDCl3): 12.48, 21.07, 26.87, 42.27, 100.41, 112.59, 112.65, 123.98, 124.51, 126.96, 127.88, 129.44, 129.58, 129.62, 130.05, 130.39, 130.93, 132.89, 137.81, 138.31, 142.49, 147.53; IR (KBr): 3464, 3367, 2971, 2921, 2249 1620, 1599, 1514, 1452, 1395, 1321, 1152, 1069, 1020, 952, 814, 774, 756, 698, 644 cm-1; HRMS m/z (ESI) : 342.1710 [M]+;Anal. Calcd for C21H19N5 (%): C (73.88), H (5.61), N (20.51); Found: C (73.98), H (5.65), N (20.57). [Figure S34, S35, S36 and S37]

**6-amino-4-(3-bromophenyl)-3-methyl-1-phenyl-4,5-dihydro-1*H*-pyrazolo[3,4-*b*]pyridine-5-carbonitrile (Table 2, Entry 12, 4l):** Yellowish white solid, Yield: 87 %, mp: 86 °C, 1H NMR (400 MHz, CDCl3): δ (ppm) = 2.24 (s, 3H, CH3), 3.57 (s, 2H, NH2), 4.61-4.63 (d, J=8 Hz, 1H, benzylic -CH), 4.68-4.70 (d, J=8 Hz,1H, -CH), 7.28 (s, 1H, ArH), 7.31-7.33 (d, J=8 Hz, 2H, ArH), 7.35-7.50 (m, 4H, ArH), 7.51-7.53 (d, J=8 Hz, 2H, ArH); 13C NMR (100 MHz, CDCl3): 12.96, 26.81, 42.28, 100.19, 112.32, 112.34, 123.57, 124.65, 125.48, 128.15, 129.68, 130.65, 130.78, 131.68, 137.60, 138.42, 142.41, 147.46,; FT-IR: 3434, 2919, 2255 1632, 1594, 1514, 1496, 1454, 1394, 1319, 1172, 1073, 1022, 996, 831, 760, 719, 695, 649 cm-1;Anal. Calcd for C20H16BrN5 (%): C (59.13), H (3.97), N (17.24); Found: C (59.23), H (3.95), N (17.31). [Figure S38, S39 and S40]

**6-amino-4-(3-flurophenyl)-3-methyl-1-phenyl-4,5-dihydro-1*H*-pyrazolo[3,4-*b*]pyridine-5 -carbonitrile (Table 2, Entry 13, 4m):** Yellowish solid, Yield: 92 %, mp: 86 °C, 1H NMR (400 MHz, CDCl3): δ (ppm) = 2.23 (s, 3H, CH3), 3.58 (s, 2H, NH2), 4.63-4.65 (d, J=8 Hz, 1H, benzylic -CH), 4.68-4.70 (d, J=8 Hz, 1H, -CH), 7.06-7.08 (d, J=8 Hz, 1H, ArH), 7.19-7.21 (d, J=8 Hz, 1H, ArH), 7.28 (s, 1H, ArH), 7.36-7.46 (m, 4H, ArH), 7.48-7.50 (d, J=8 Hz, 2H, ArH); 13C NMR (100 MHz, CDCl3): 12.90, 26.85, 42.29, 42.30, 100.18, 112.39, 112.43, 114.69, 114,88, 115.48, 115.69, 122.56, 122.59, 122.68, 124.62, 128.12, 128.86,128.90, 129.67, 130.95, 131.03, 137.62, 138.62, 138.68, 142.48, 147.50, 161.91, 164.38; IR (KBr): 3348, 2971, 2259, 2174, 1613, 1591, 1515, 1443, 1352, 1135, 1072, 951, 878, 760, 695, 647 cm-1; Anal. Calcd for C20H16FN5 (%): C (69.55), H (4.67), N (20.28); Found: C (69.45), H (4.61), N (20.34). [Figure S41, S42 and S43]

**6-amino-4-[4-(trifluromethyl)phenyl]-3-methyl-1-phenyl-4,5-dihydro-1*H*-pyrazolo[3,4-*b*] pyridine-5-carbonitrile (Table 2, Entry 14, 4n):** Faint yellow solid, Yield: 96 %, mp: 84 °C, 1H NMR (400 MHz, CDCl3): δ (ppm) = 2.25 (s, 3H, CH3), 3.53 (s, 2H, NH2), 4.73 (s, 2H, -CH, benzylic -CH), 7.28 (s, 1H, ArH), 7.40-7.56 (m, 4H, ArH), 7.54-7.56 (d, J=8 Hz, 2H, ArH), 7.72-7.74 (d, J=8 Hz, 2H, ArH); 13C NMR (100 MHz, CDCl3): 12.96, 26.76, 42.54, 100.19, 112.26, 112.31, 124.65, 126.30, 126.33, 126.37, 126.41, 127.73, 128.20, 129.70, 137.57, 140.16, 142.35, 147.40; IR (KBr): 3350, 2970, 2925, 2255, 1619, 1596, 1515, 1455, 1395, 1323, 1164, 1068, 1016, 953, 827, 759, 697, 647 cm-1; HRMS m/z (ESI) : 396**.**1587 [M]+; Anal. Calcd for C21H16F3N5 (%): C (63.79), H (4.08), N (17.71); Found: C (63.86), H (4.12), N (17.73). [Figure S44, S45, S46 and S47]


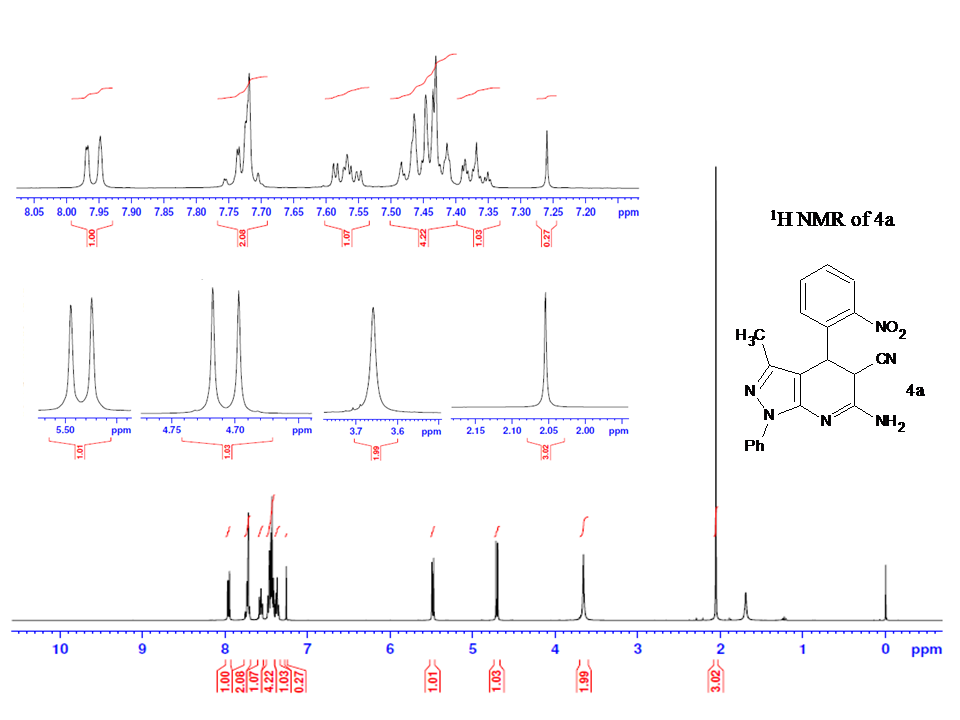


**Figure S1-a**

**
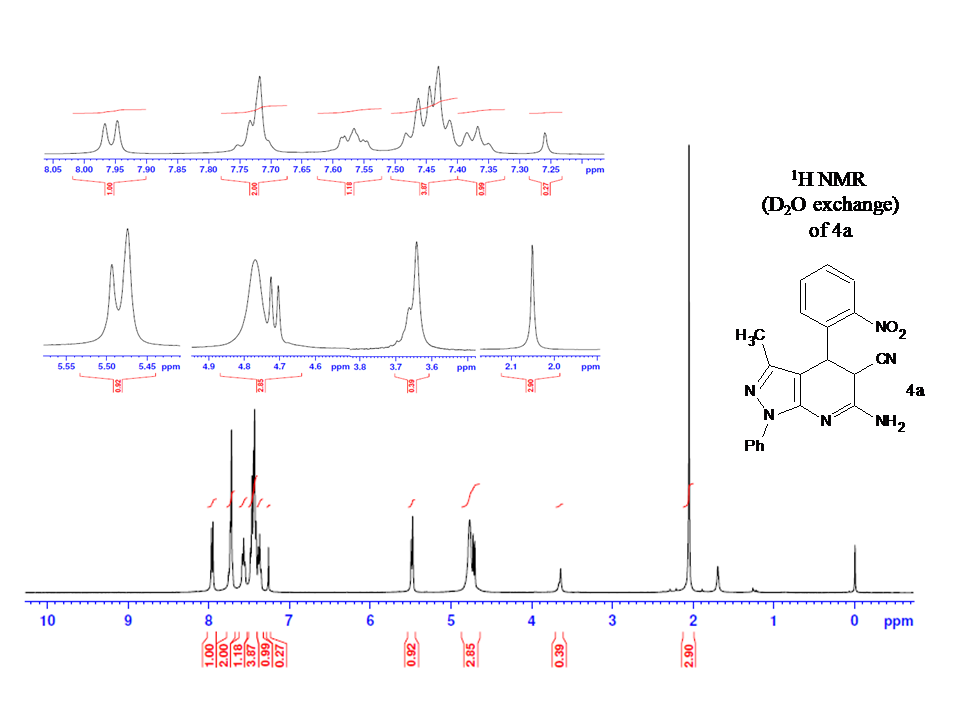
**

**Figure S1-b**


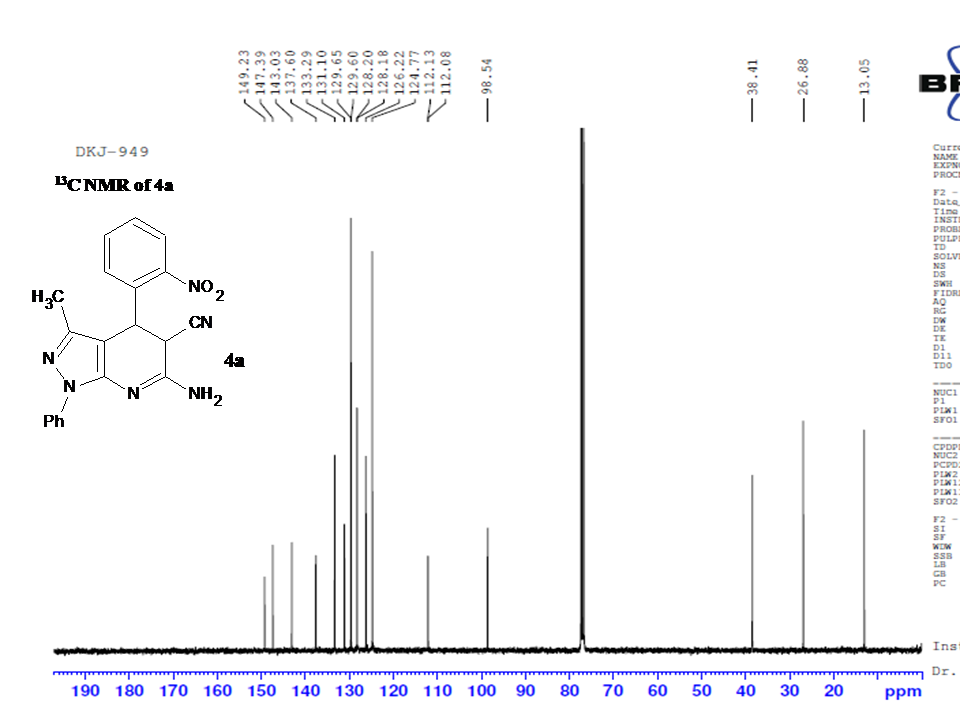


**Figure S2-a**

**
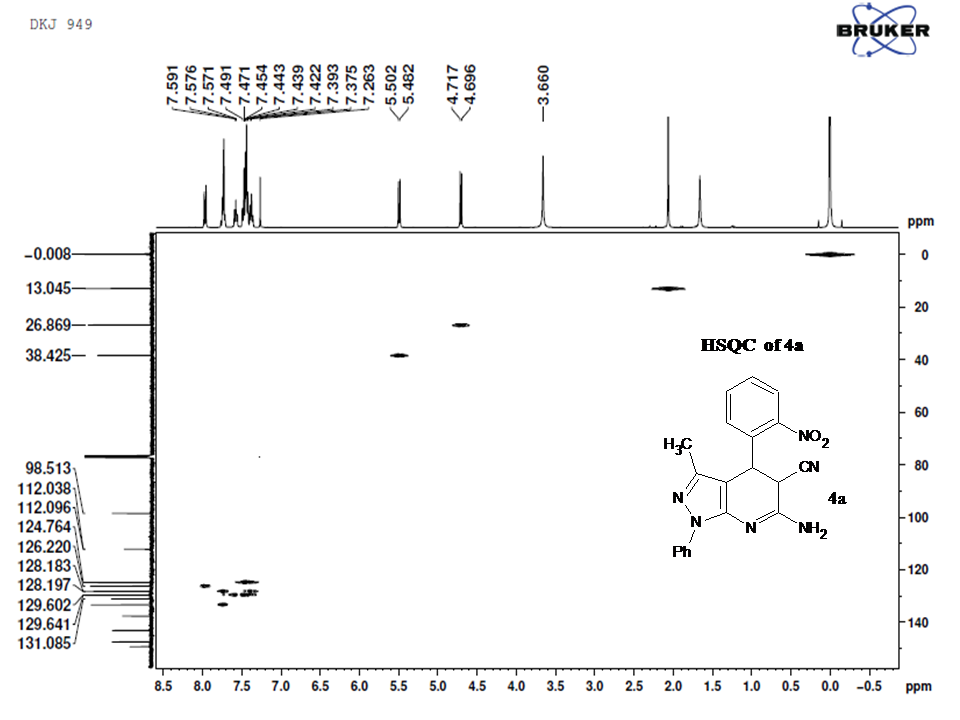
**

**Figure S2-b**


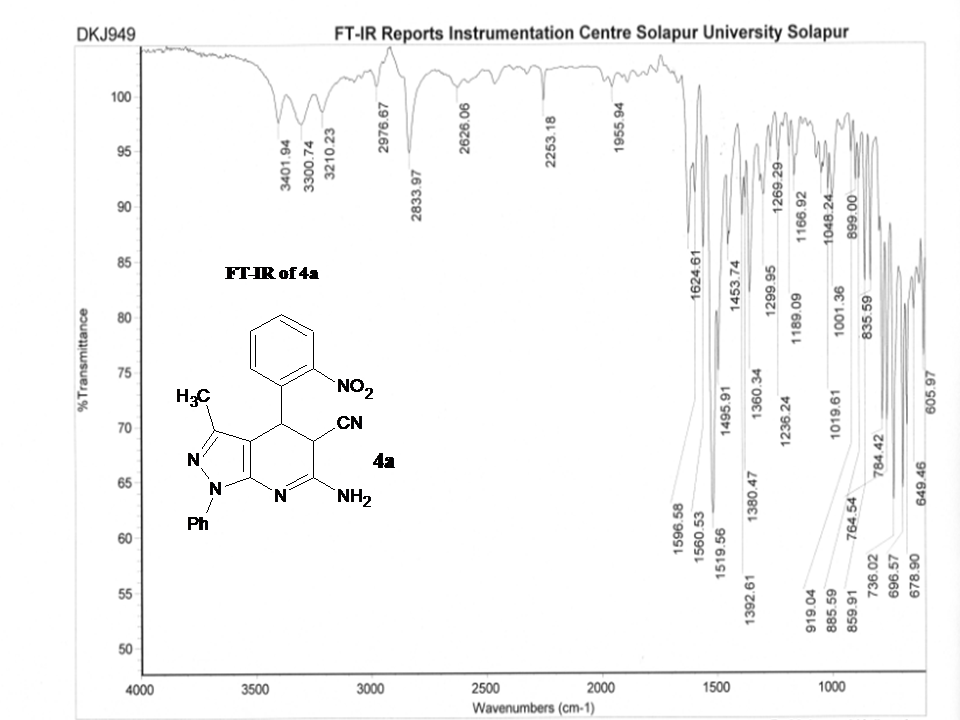


**Figure S3**


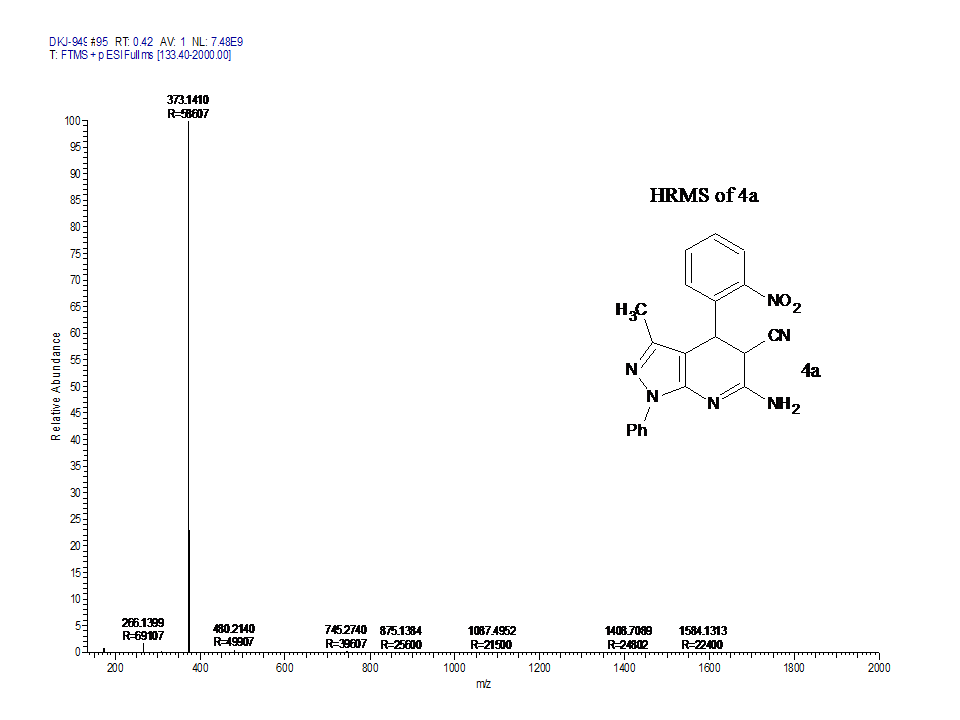


**Figure S4**


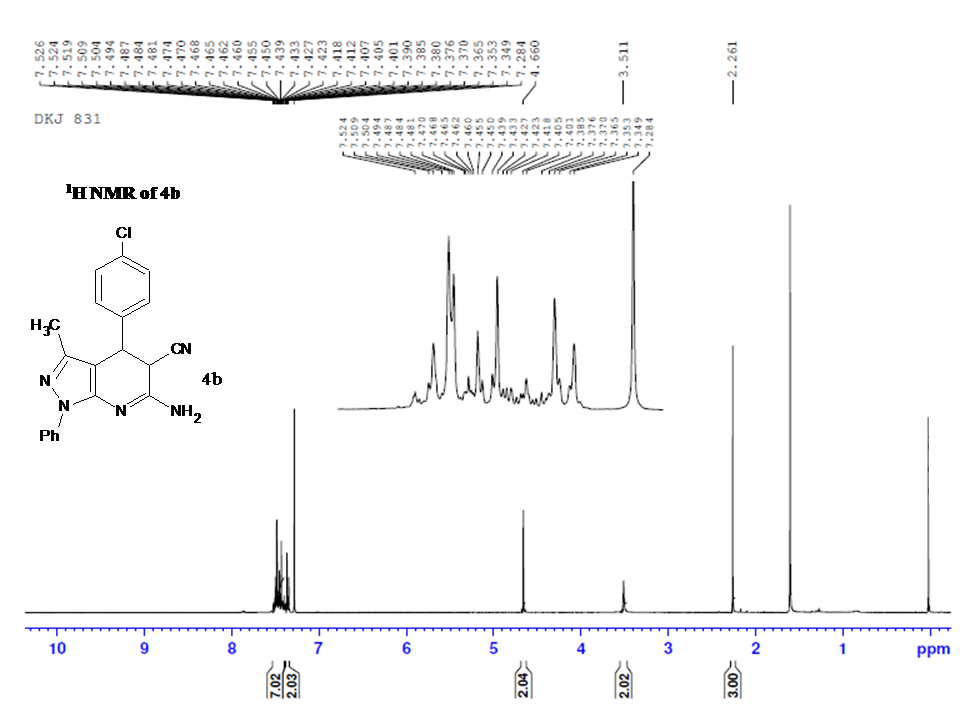


**Figure S5**


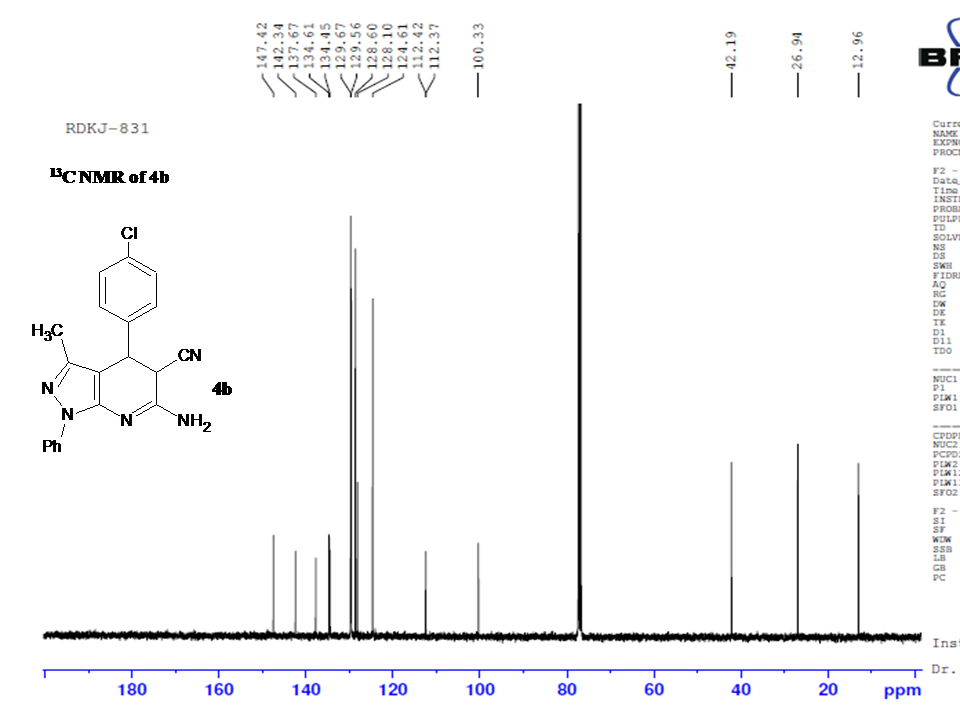


**Figure S6**


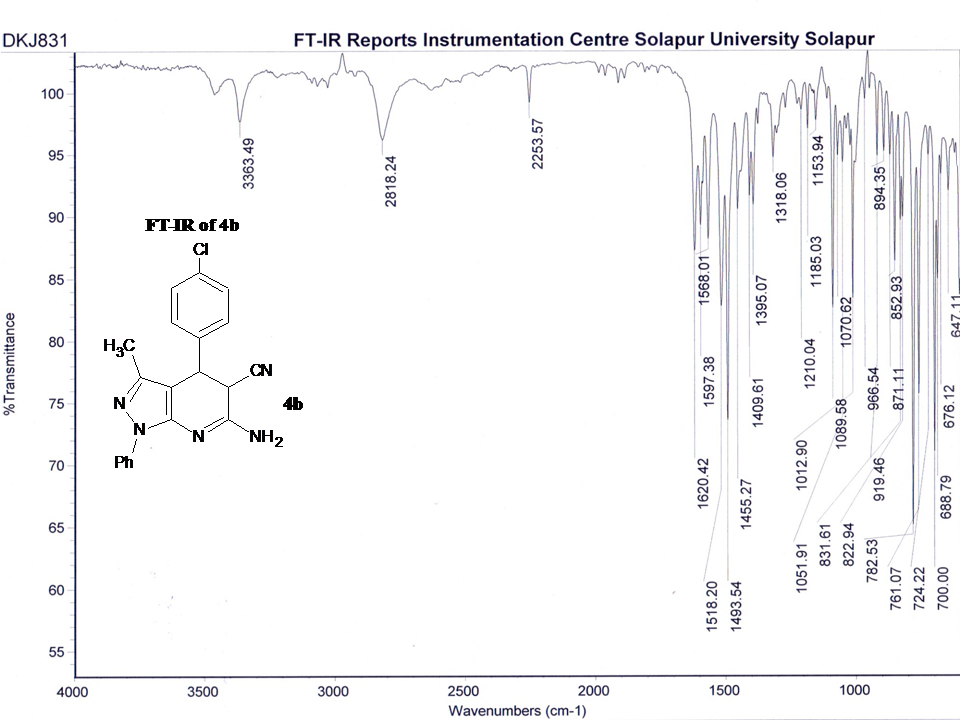


**Figure S7**


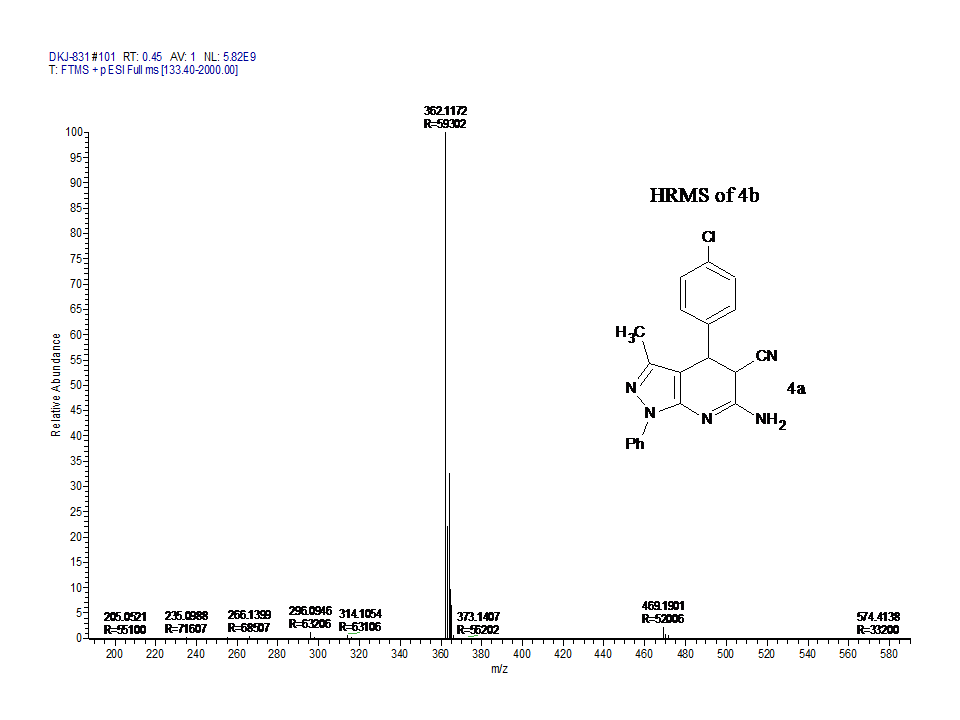


**Figure S8**


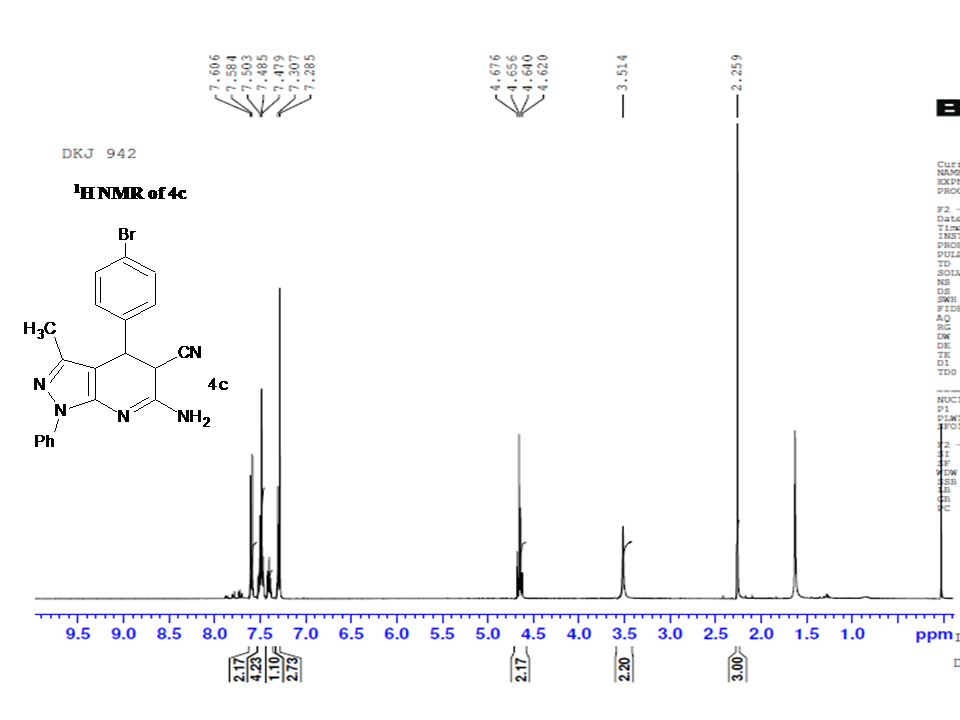


**Figure S9**


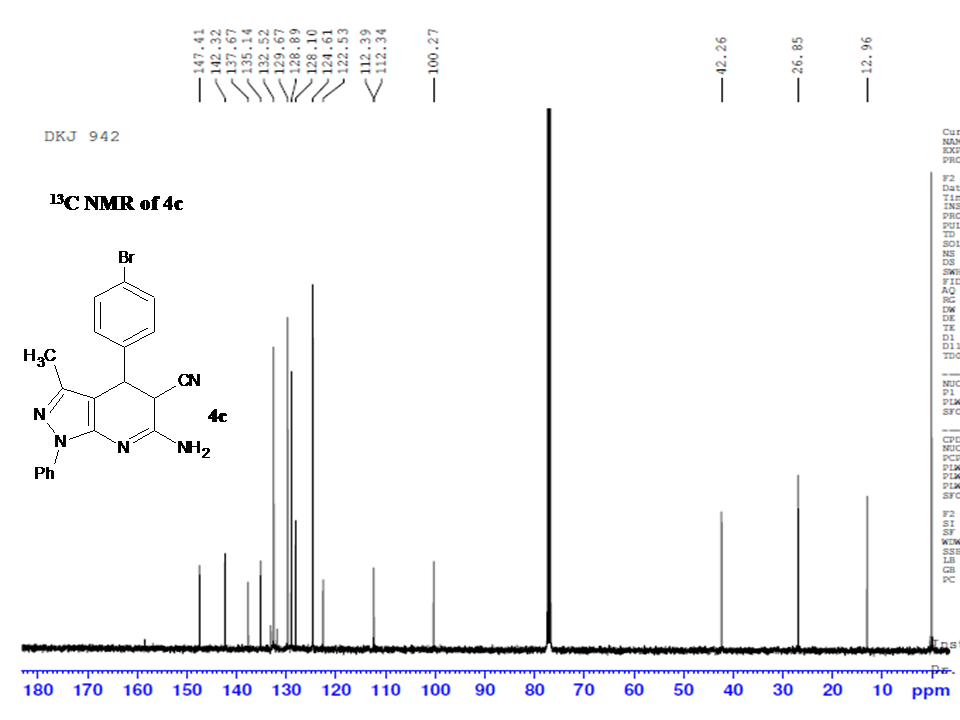


**Figure S10**


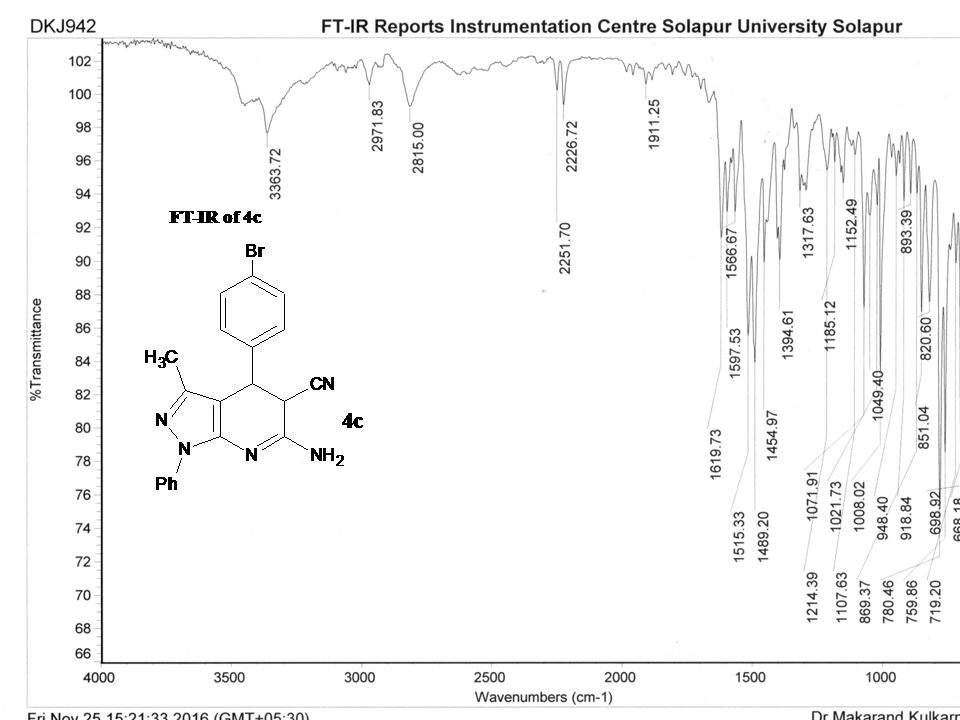


**Figure S11**


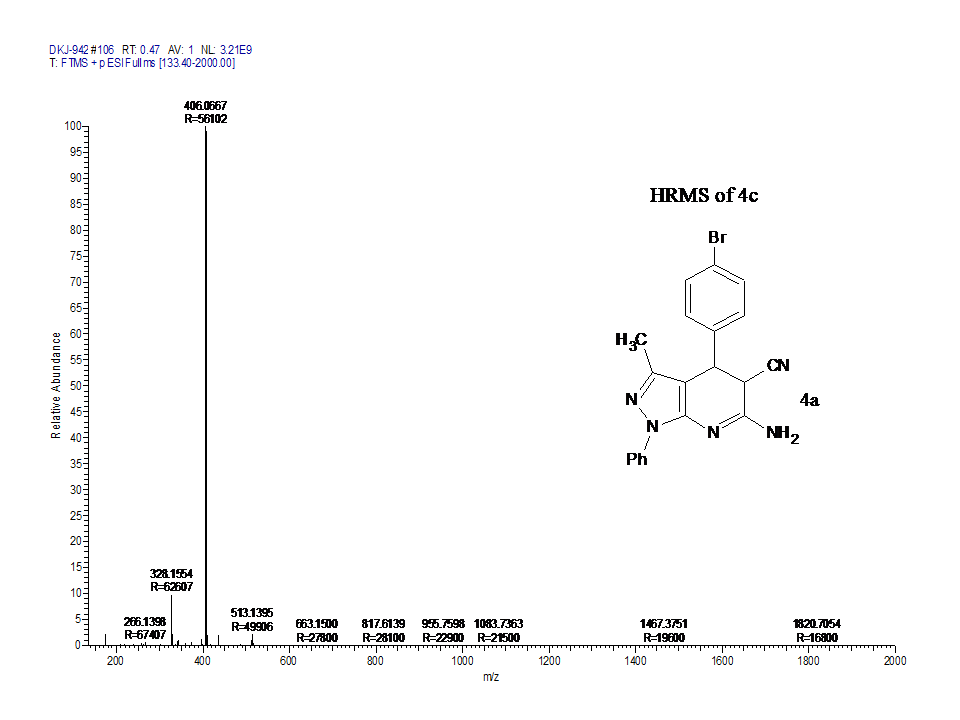


**Figure S12**


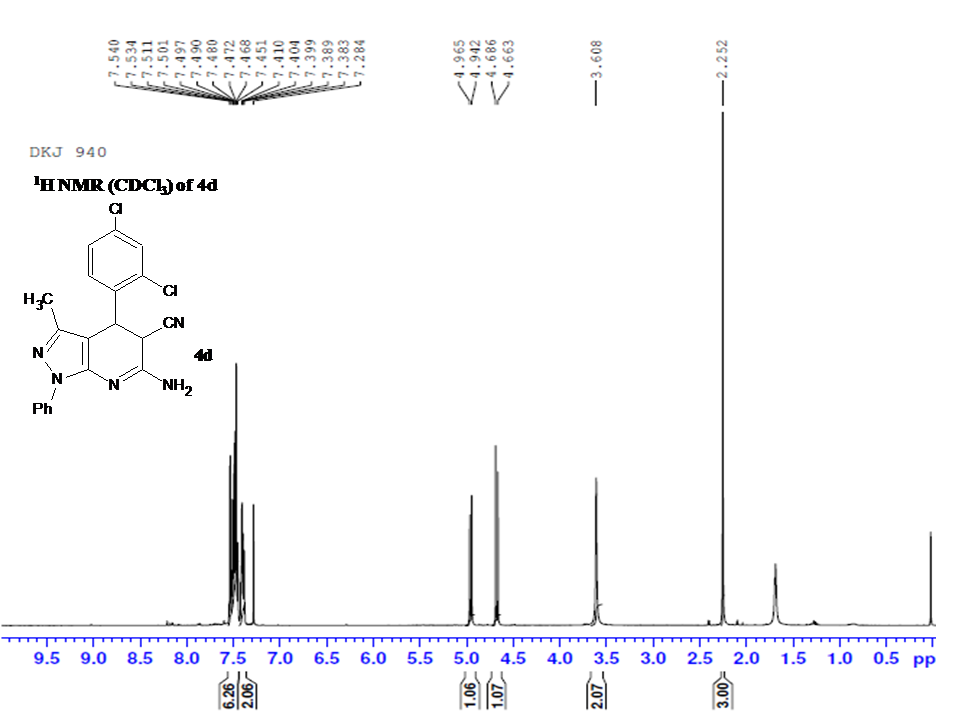


**Figure S13**


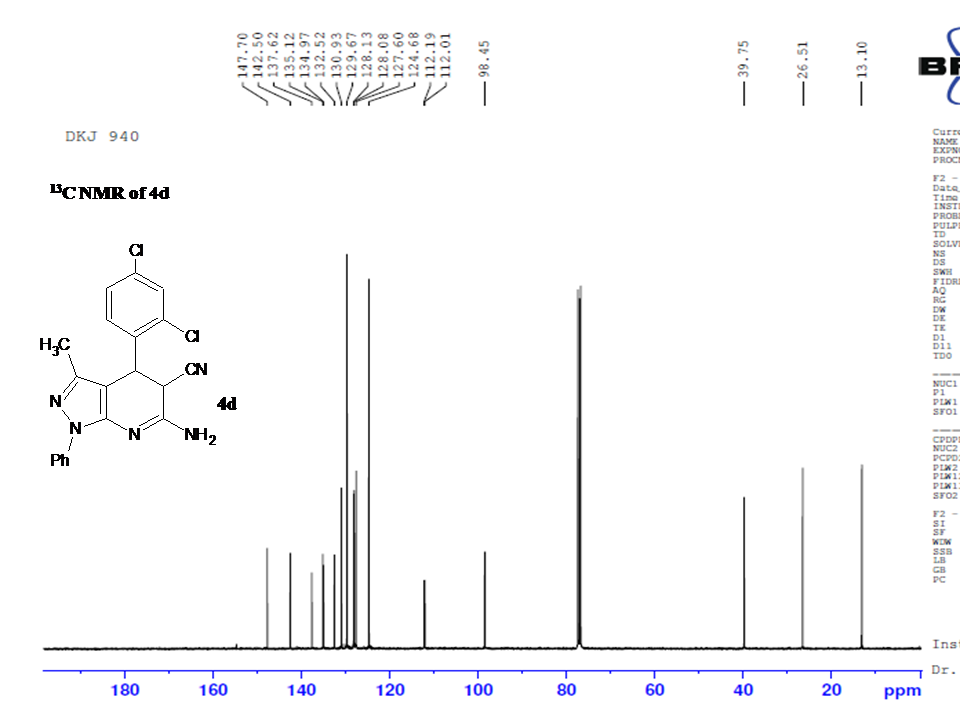


**Figure S14**


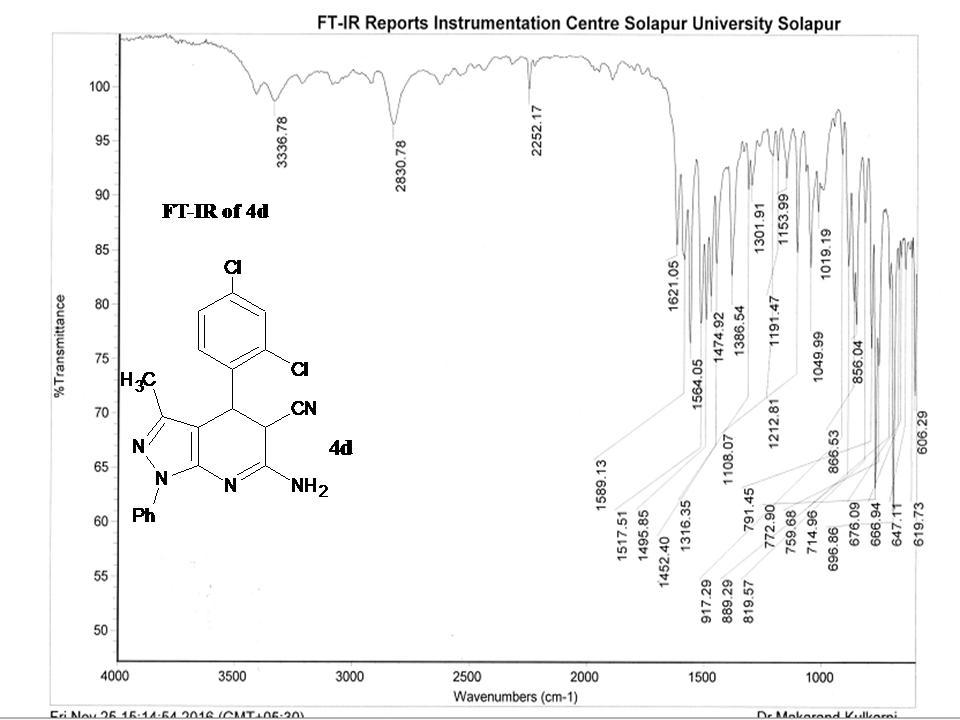


**Figure S15**


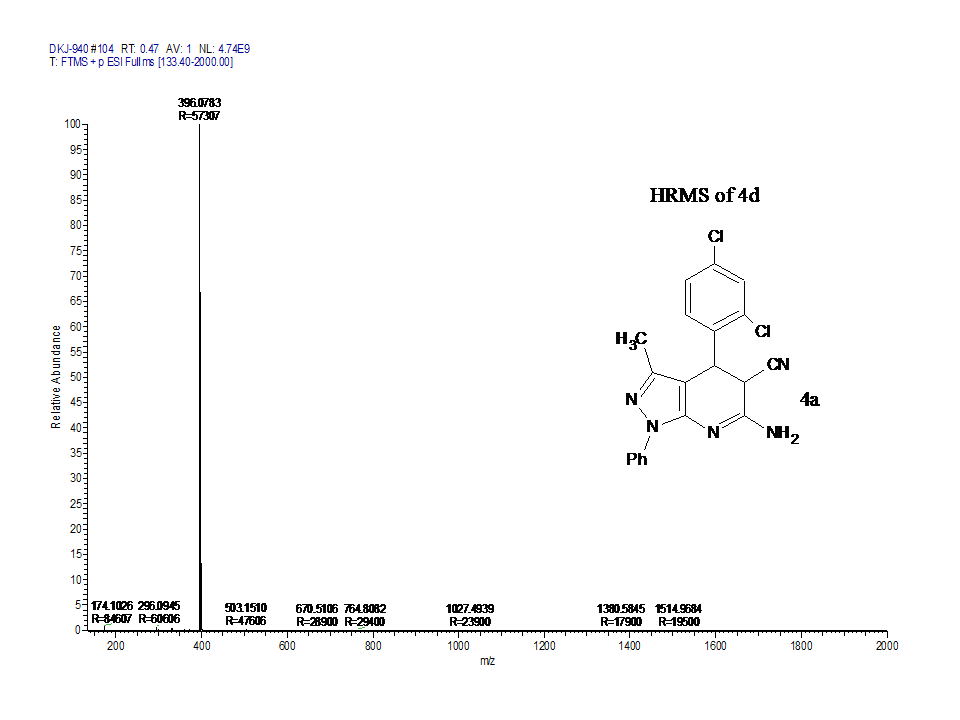


**Figure S16**


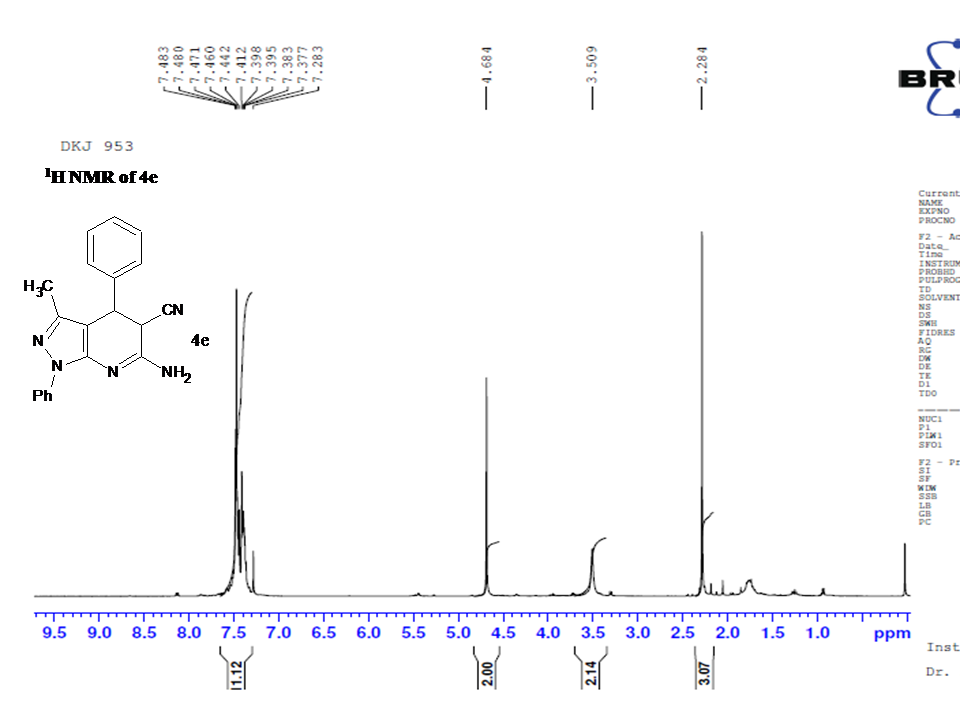


**Figure S17**


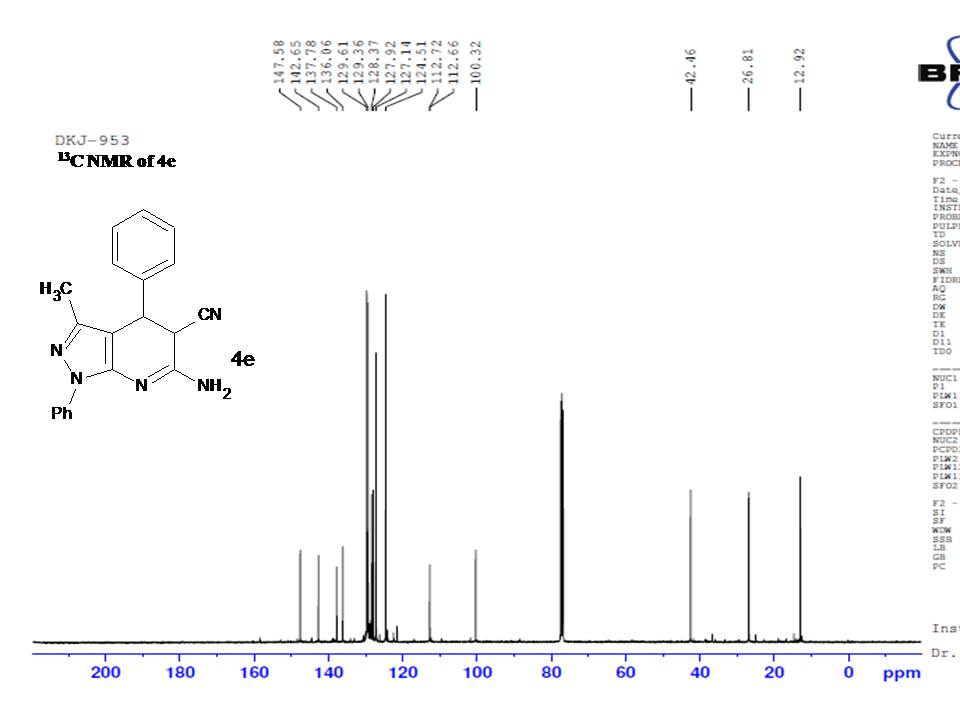


**Figure S18**


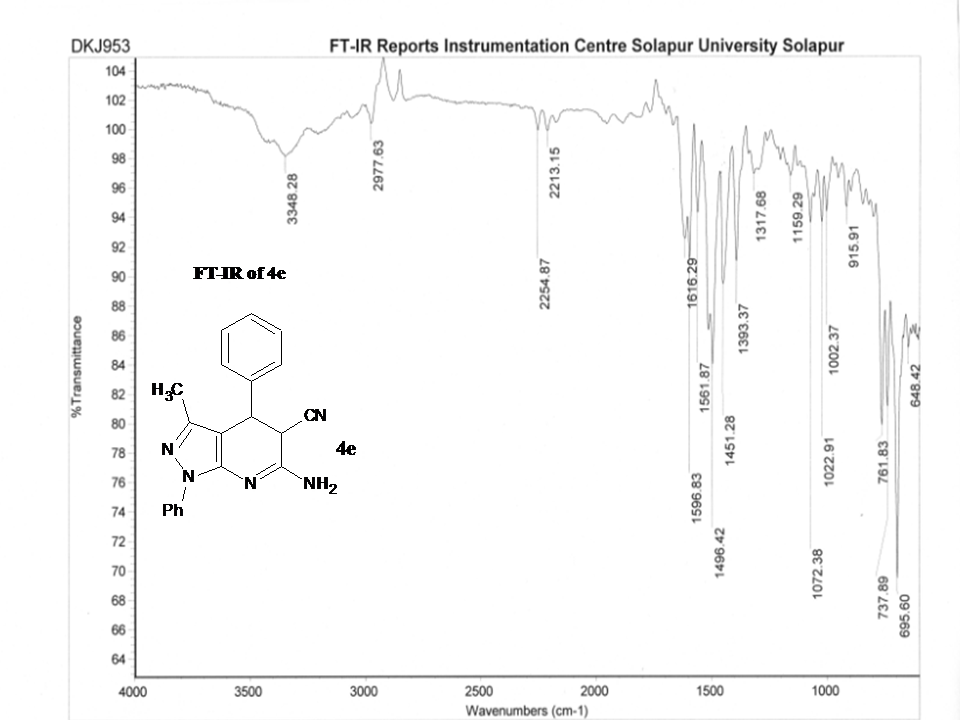


**Figure S19**


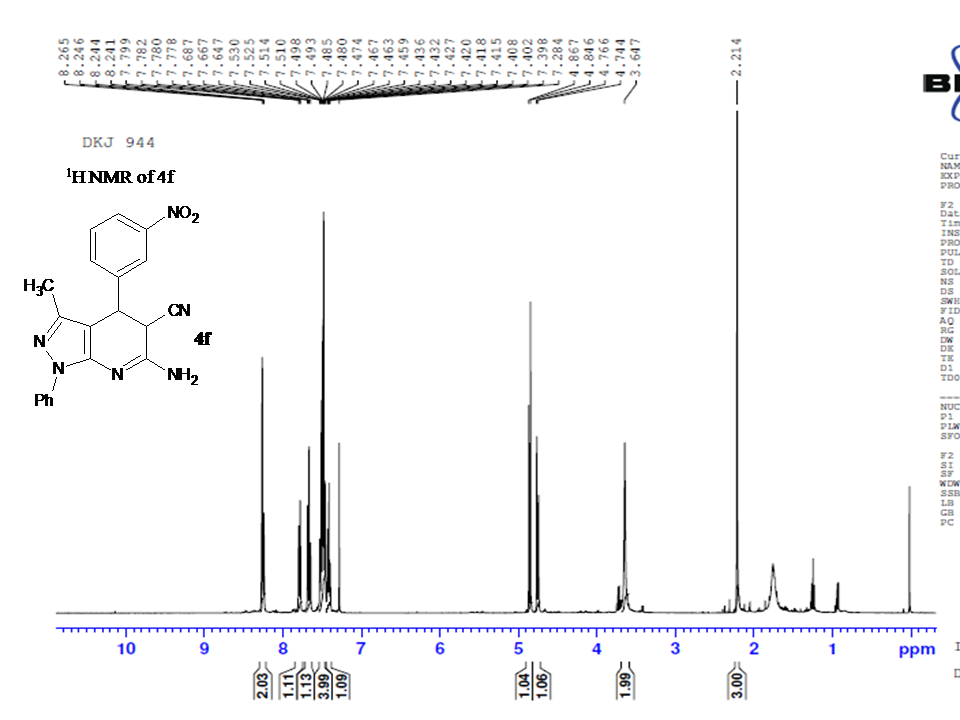


**Figure S20**


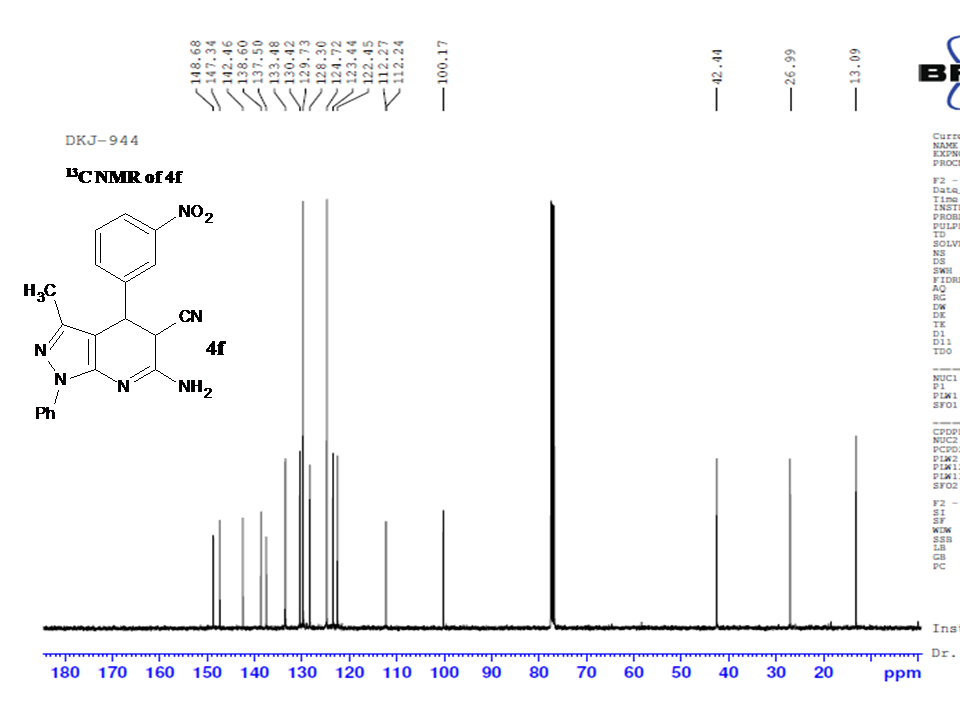


**Figure S21**


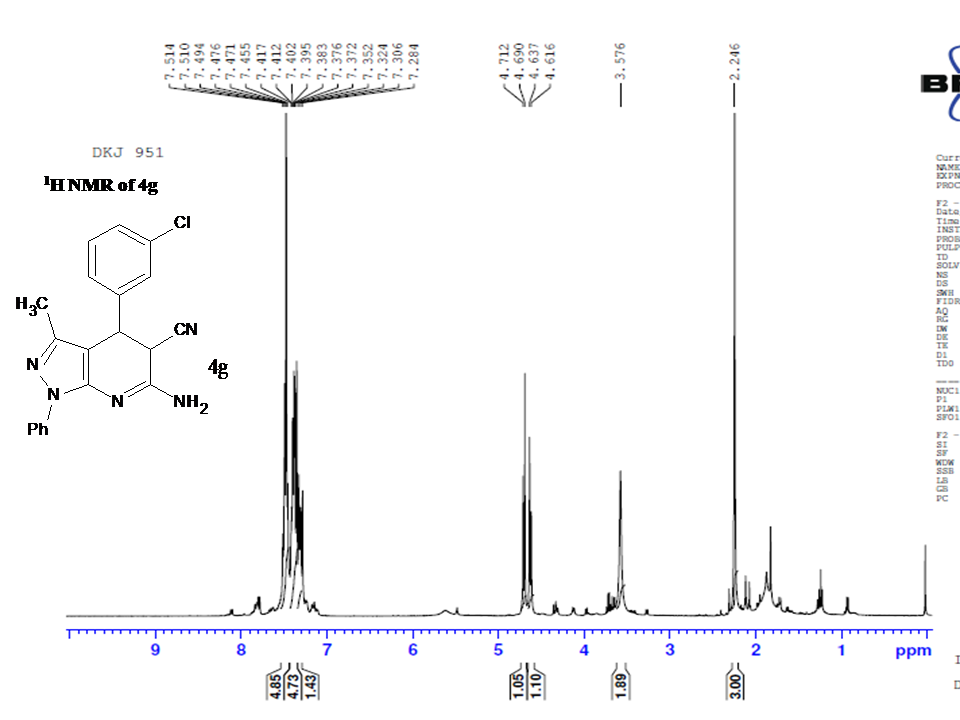


**Figure 22**


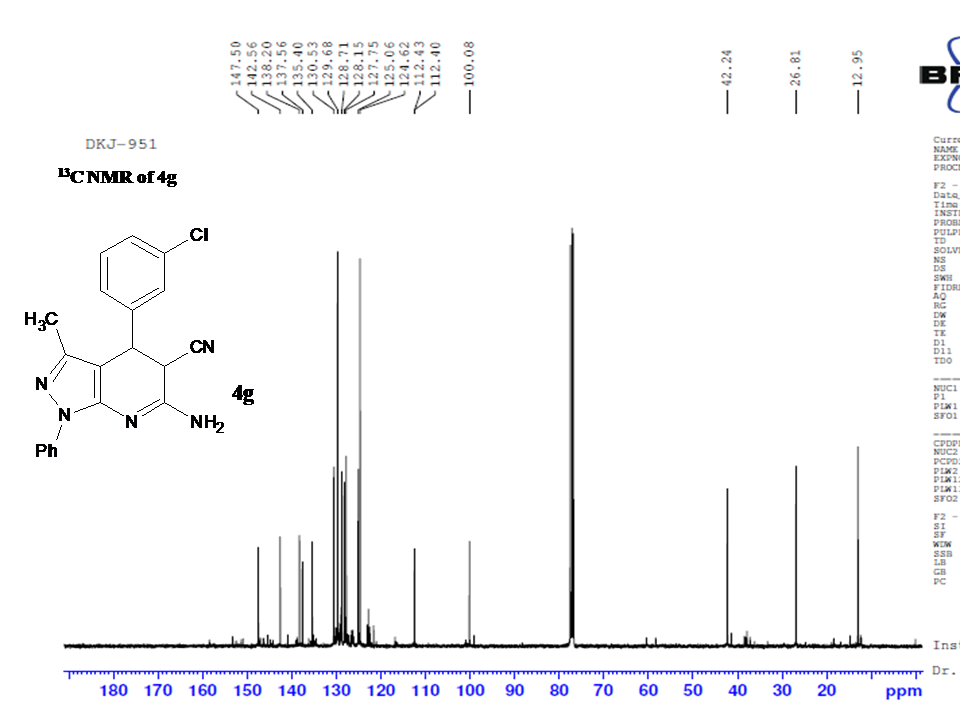


**Figure 23**


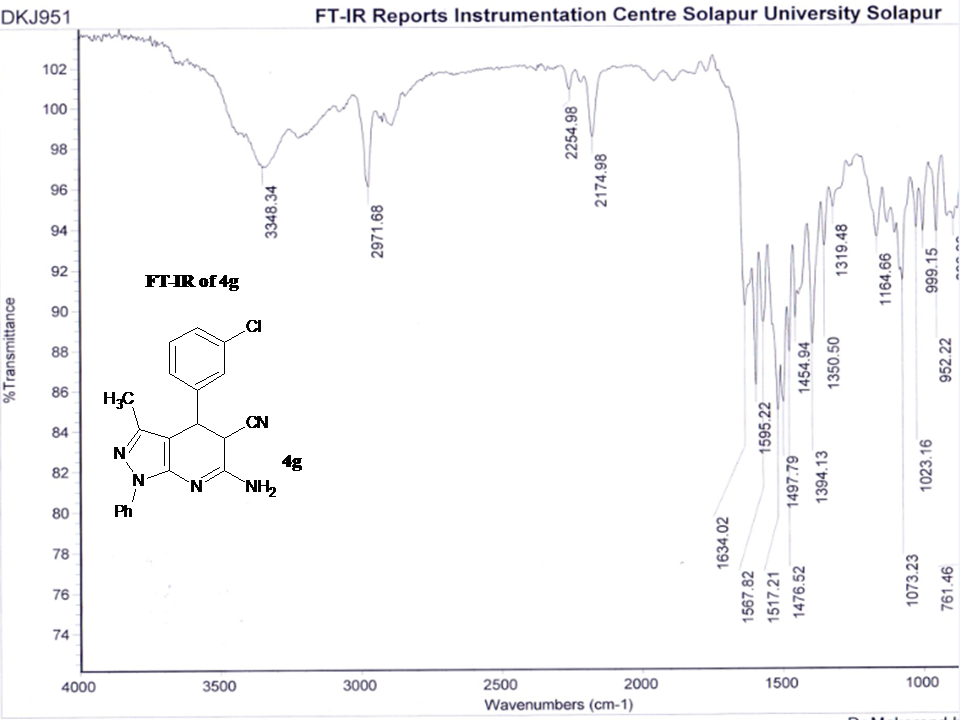


**Figure S24**


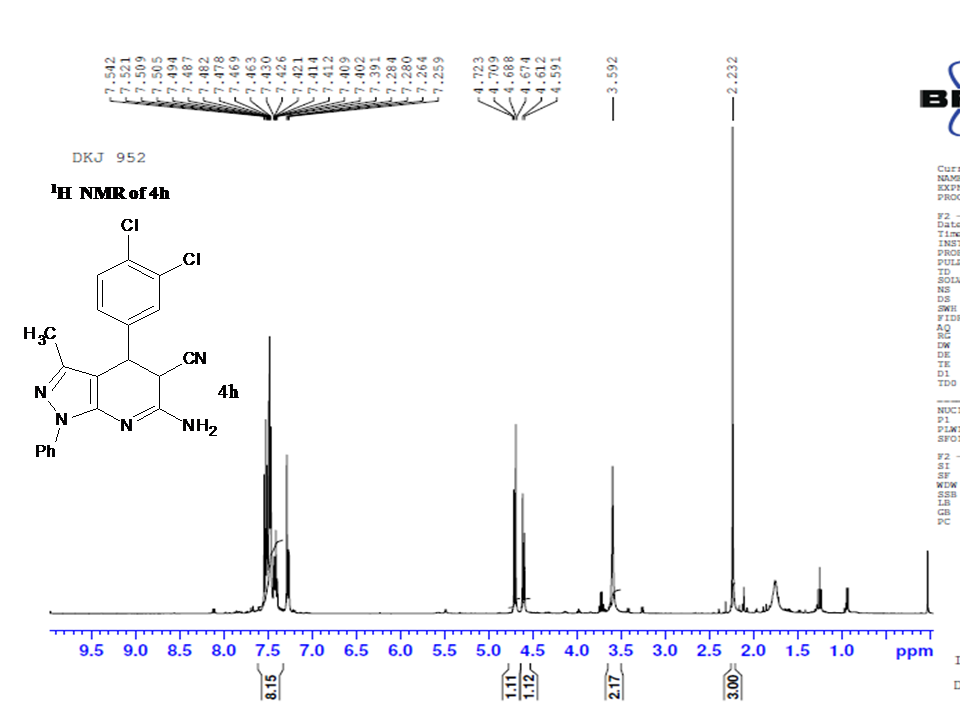


**Figure S25**


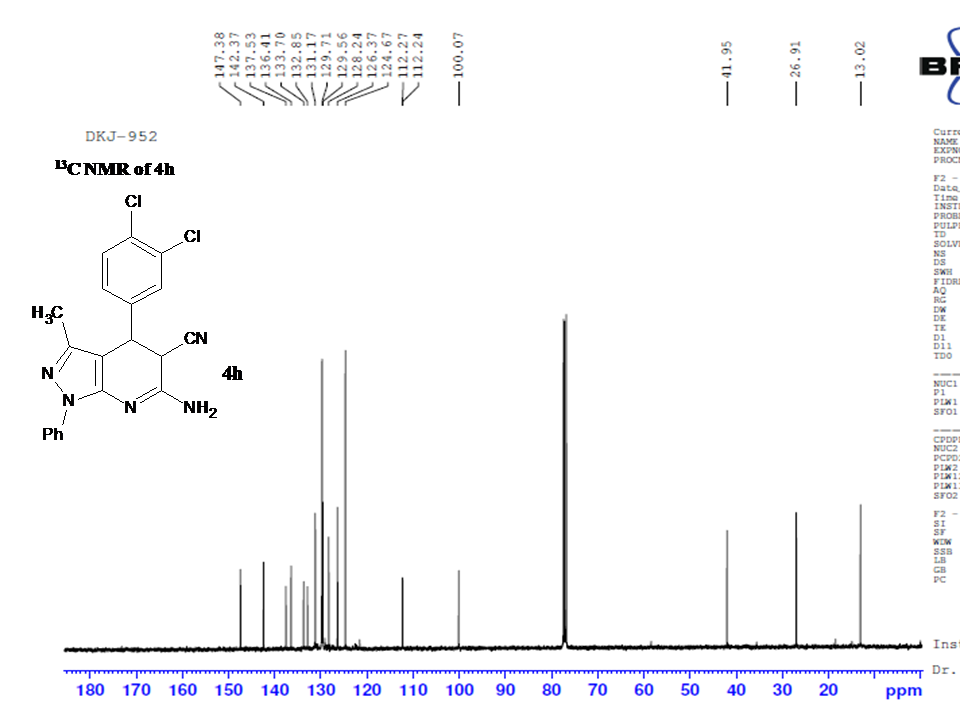


**Figure S26**


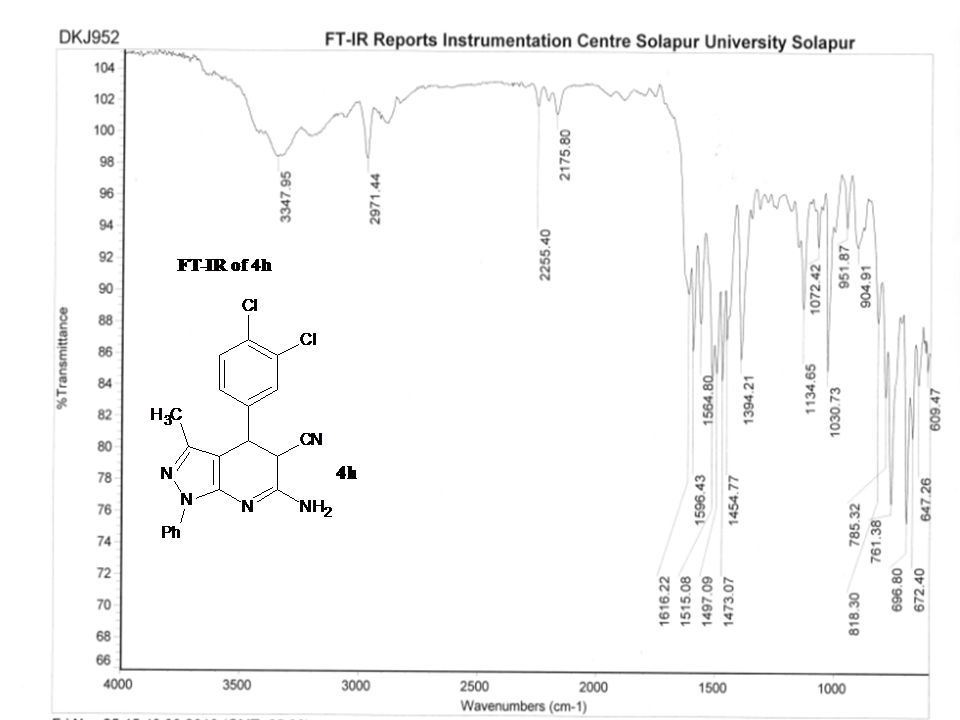


**Figure S27**


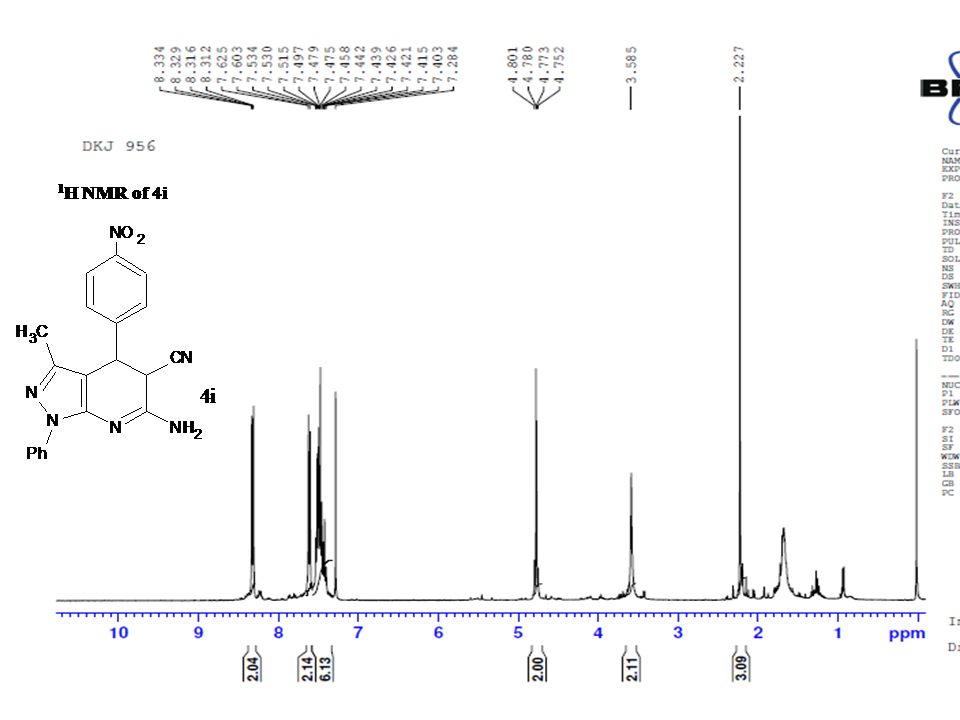


**Figure S28**


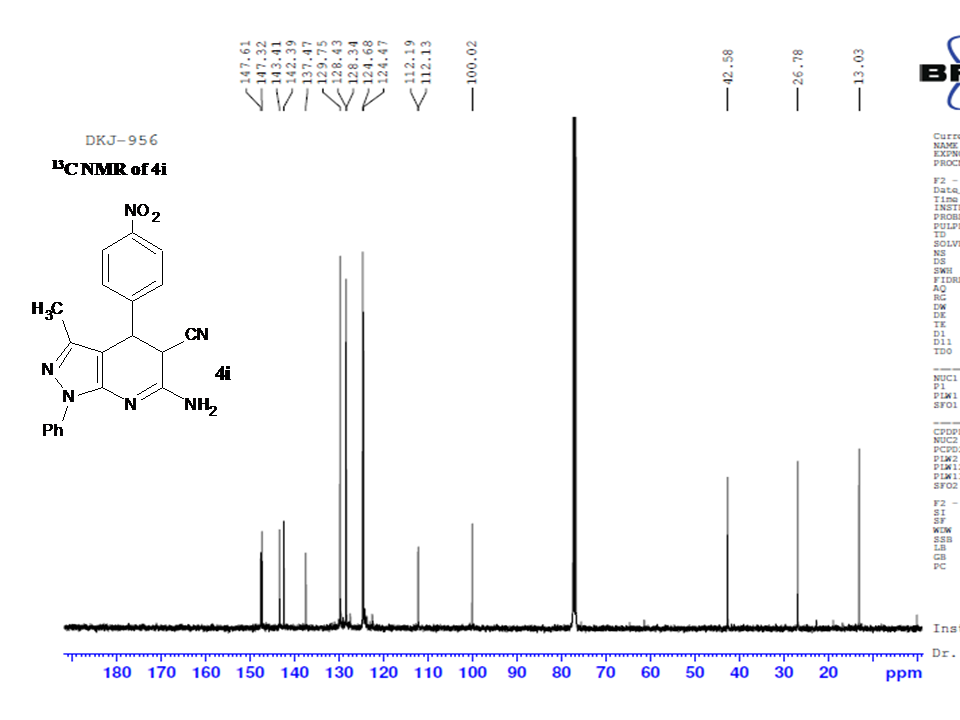


**Figure S29**


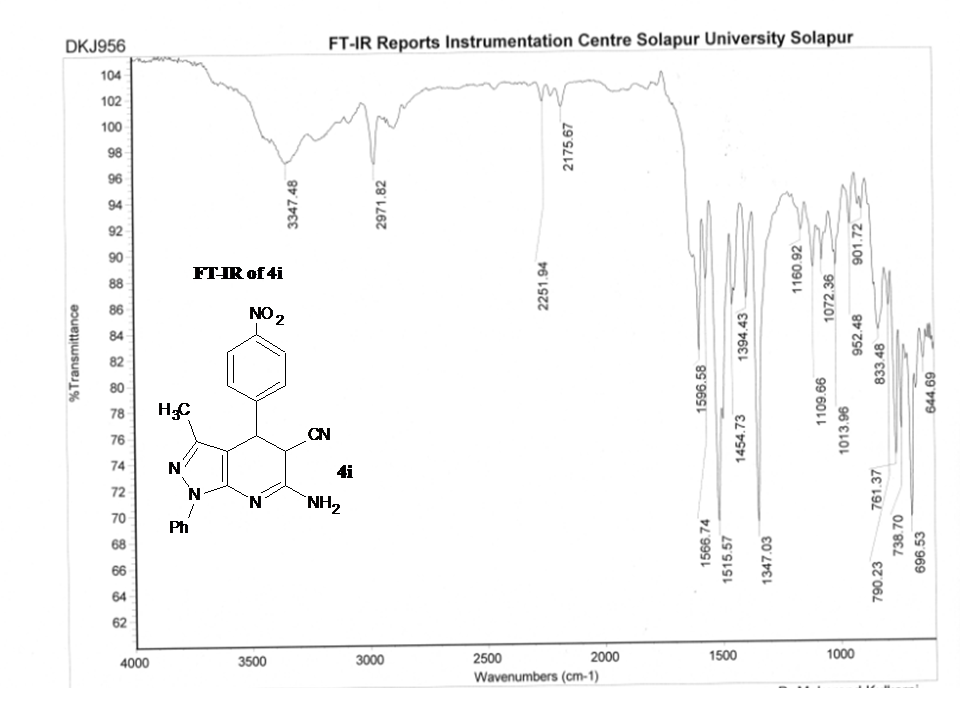


**Figure S30**


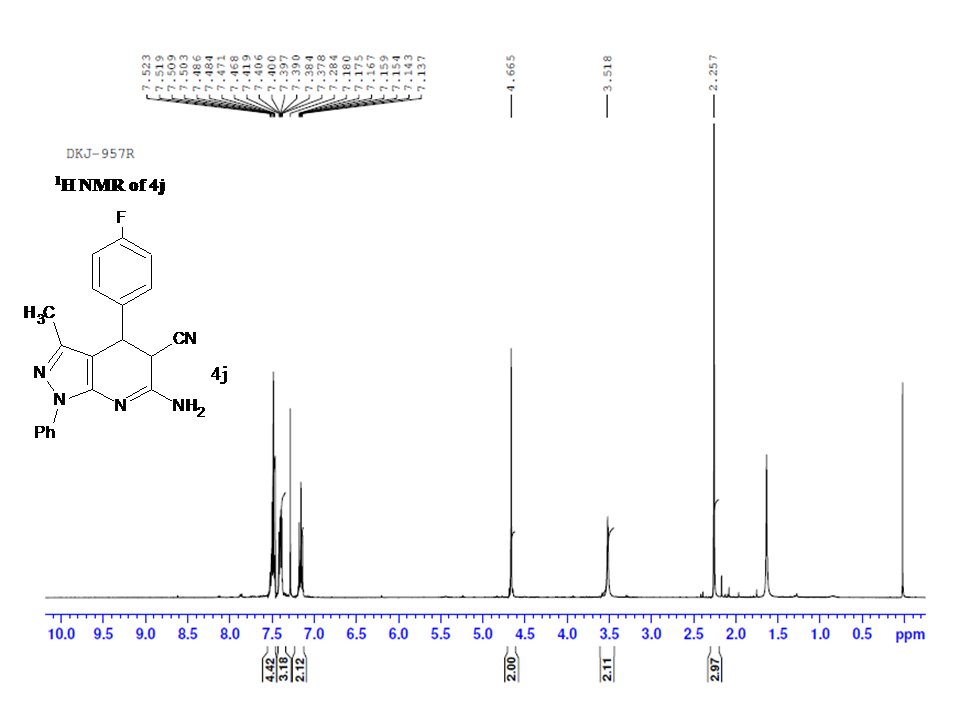


**Figure S31**


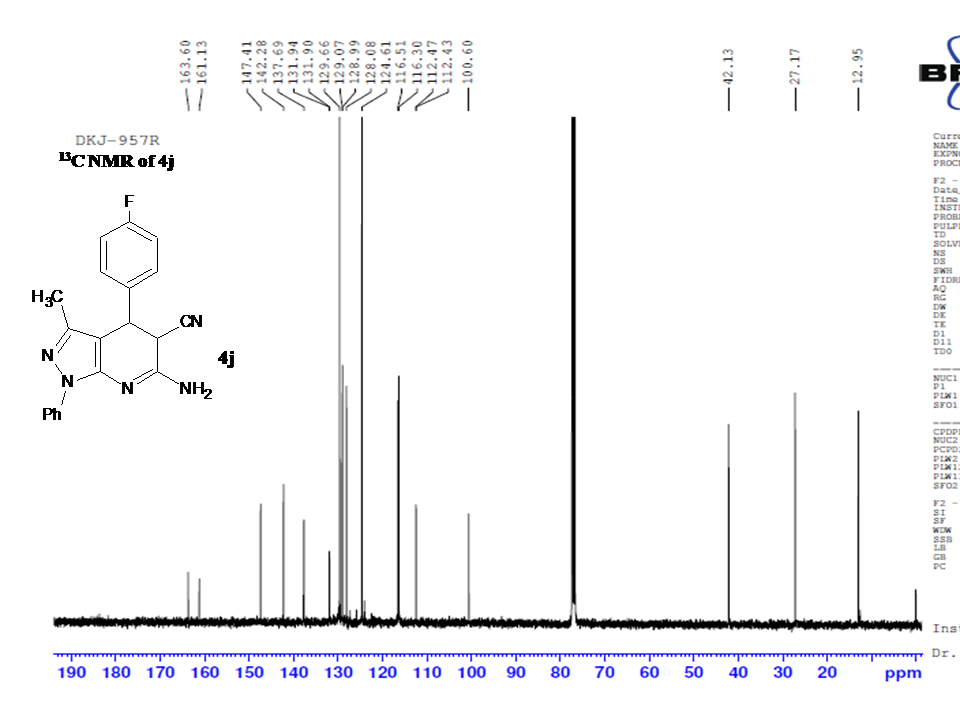


**Figure S32**


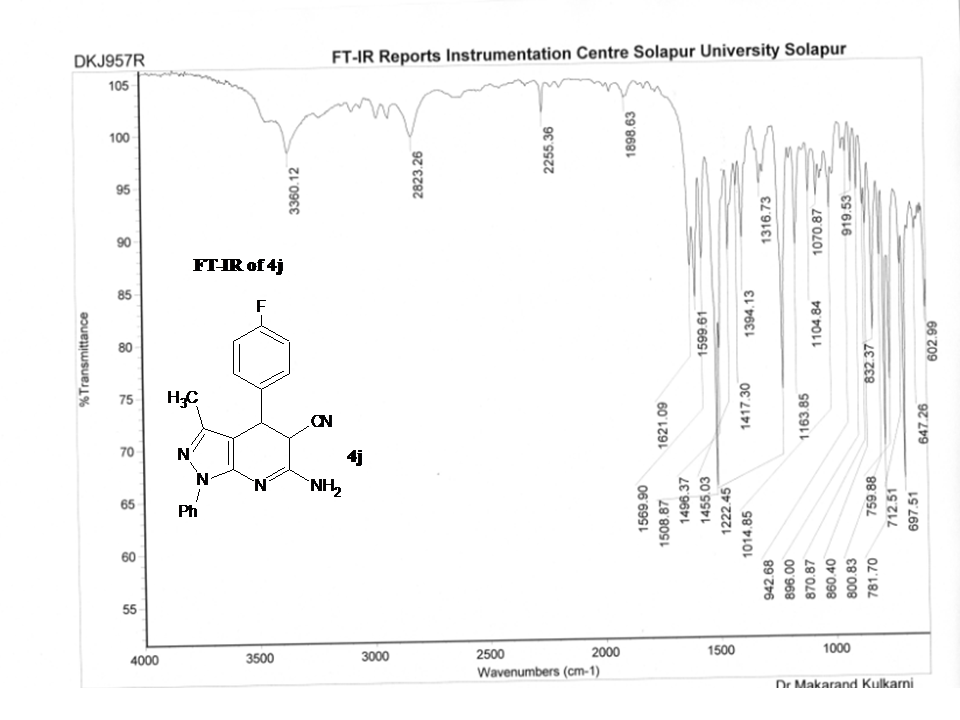


**Figure S33**


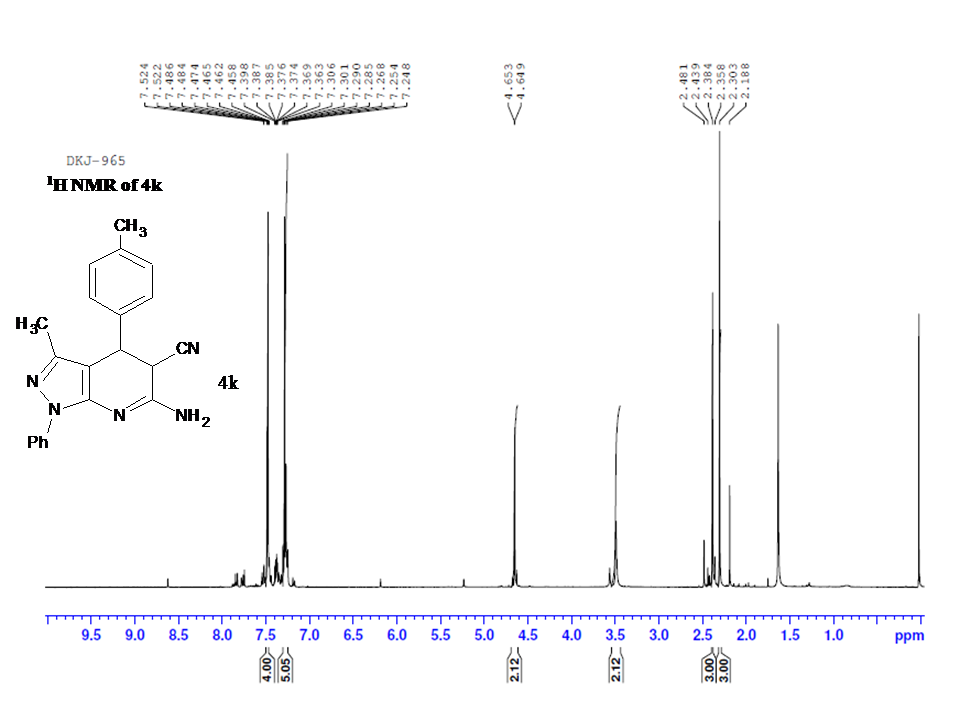


**Figure S34**


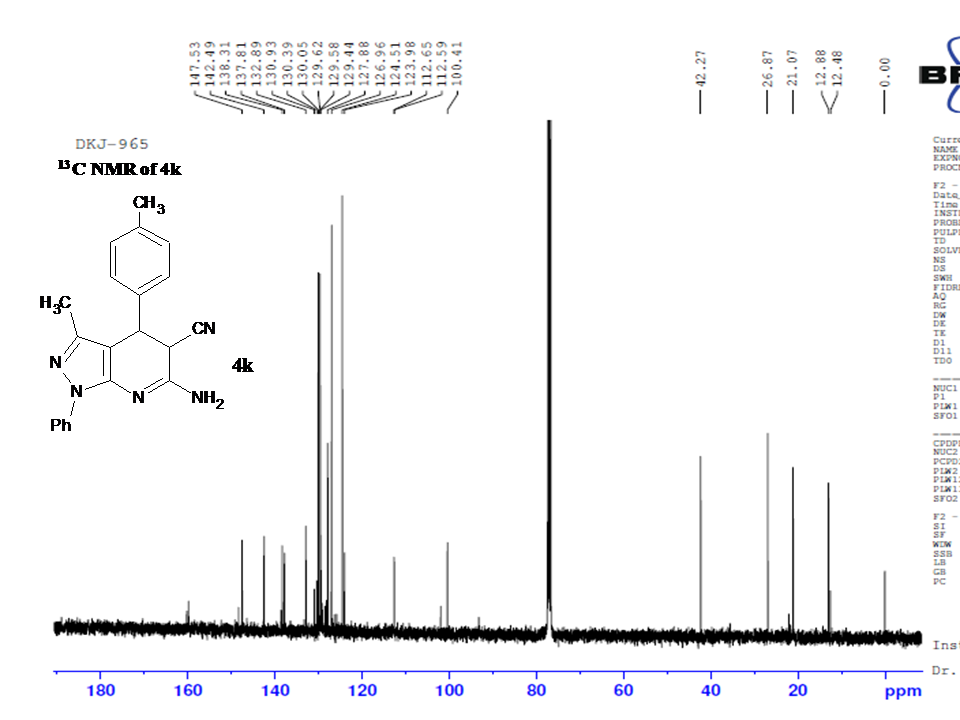


**Figure S35**


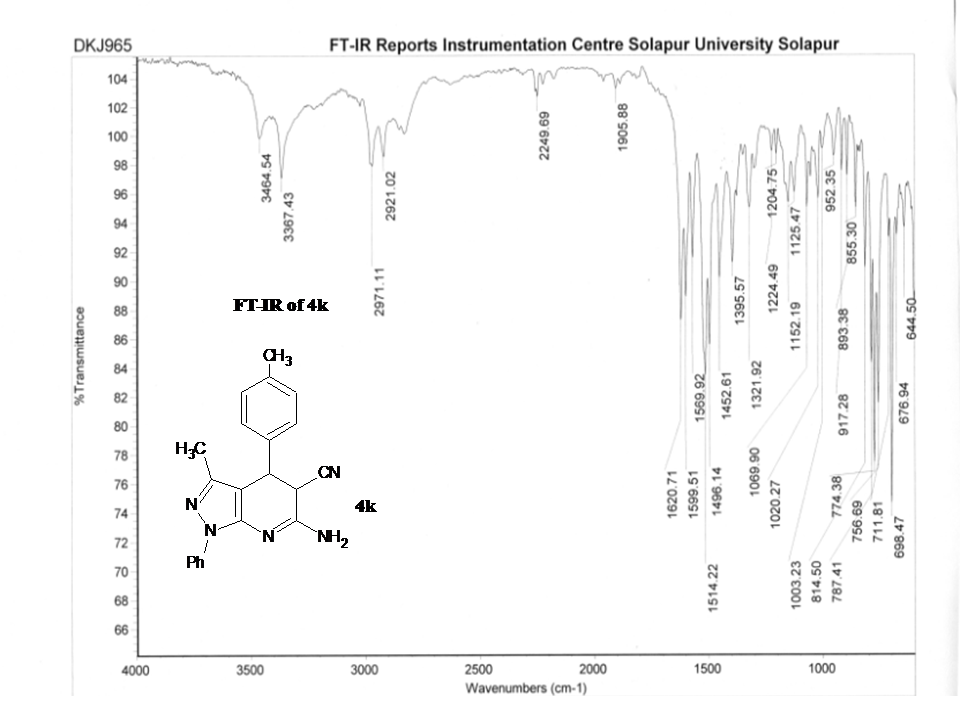


**Figure S36**


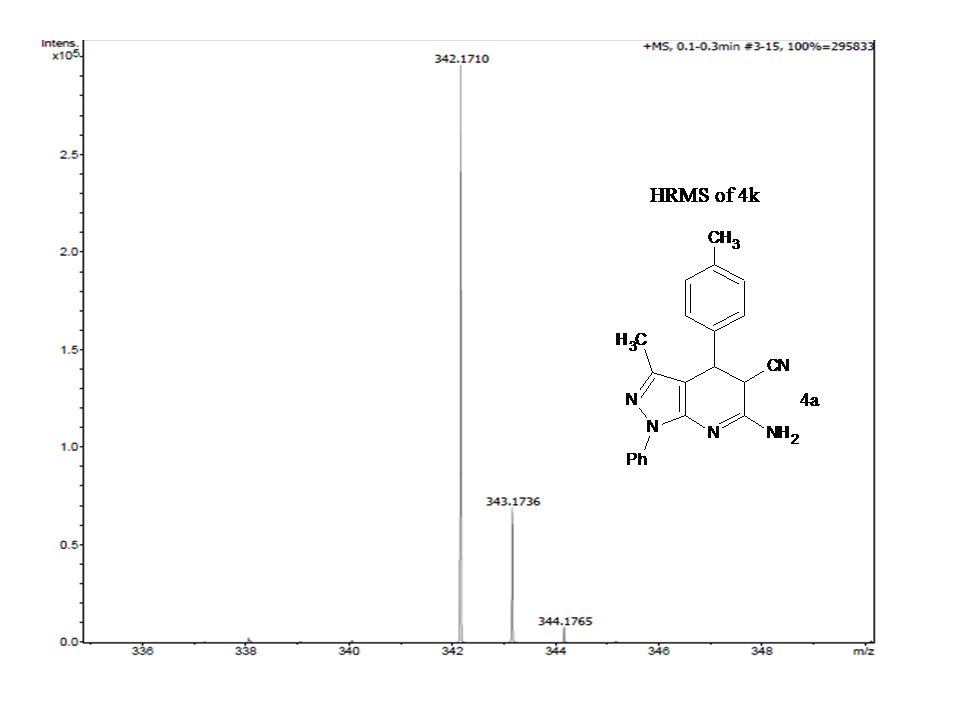


**Figure S37**


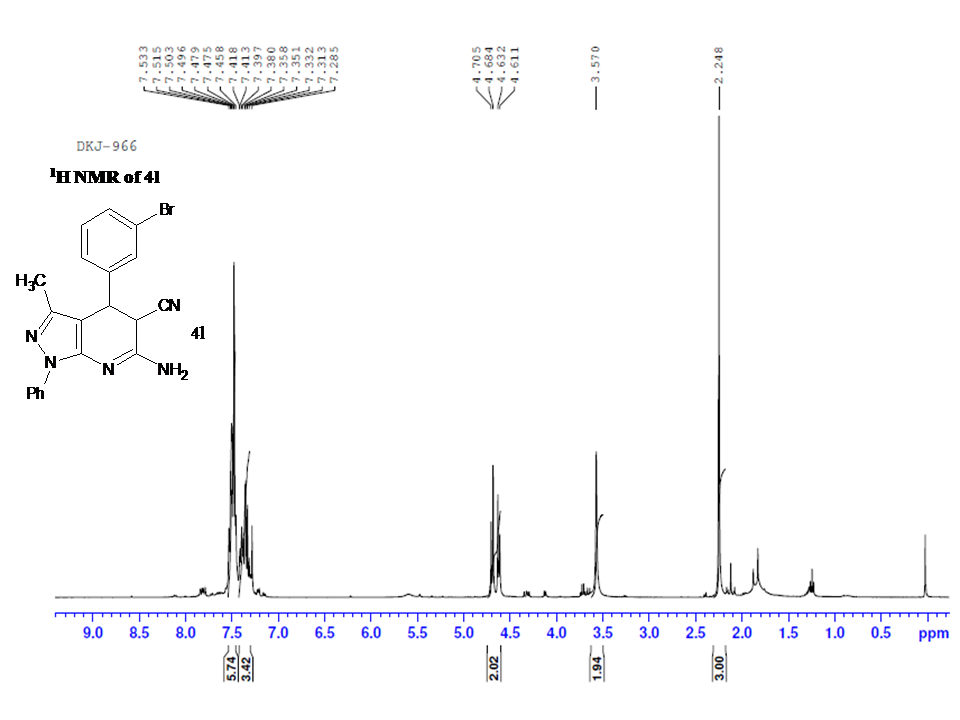


**Figure S38**


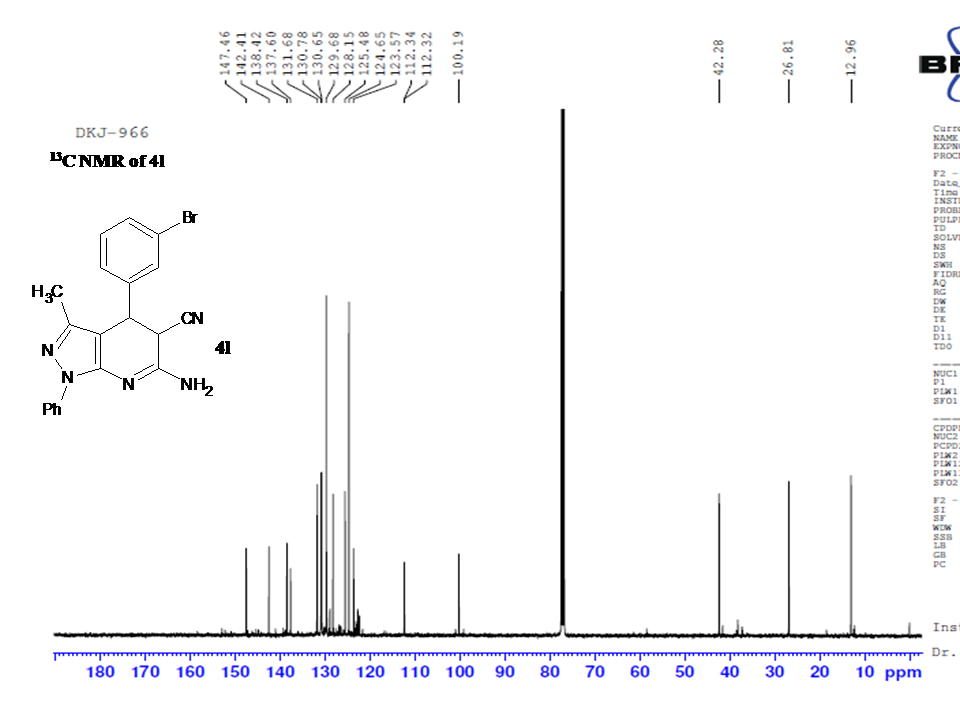


**Figure S39**


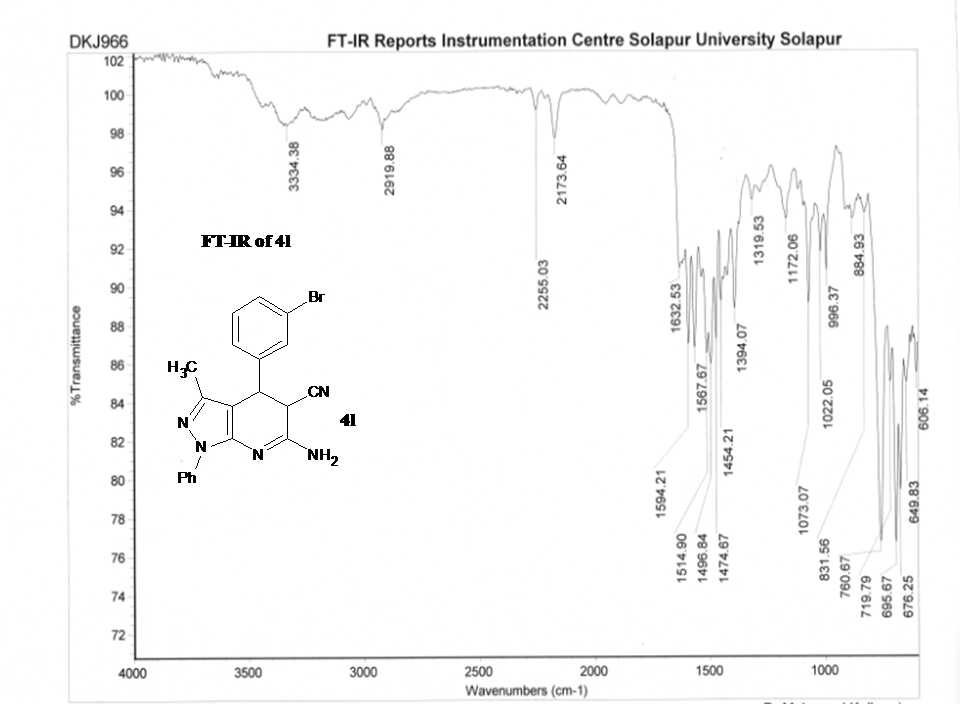


**Figure S40**


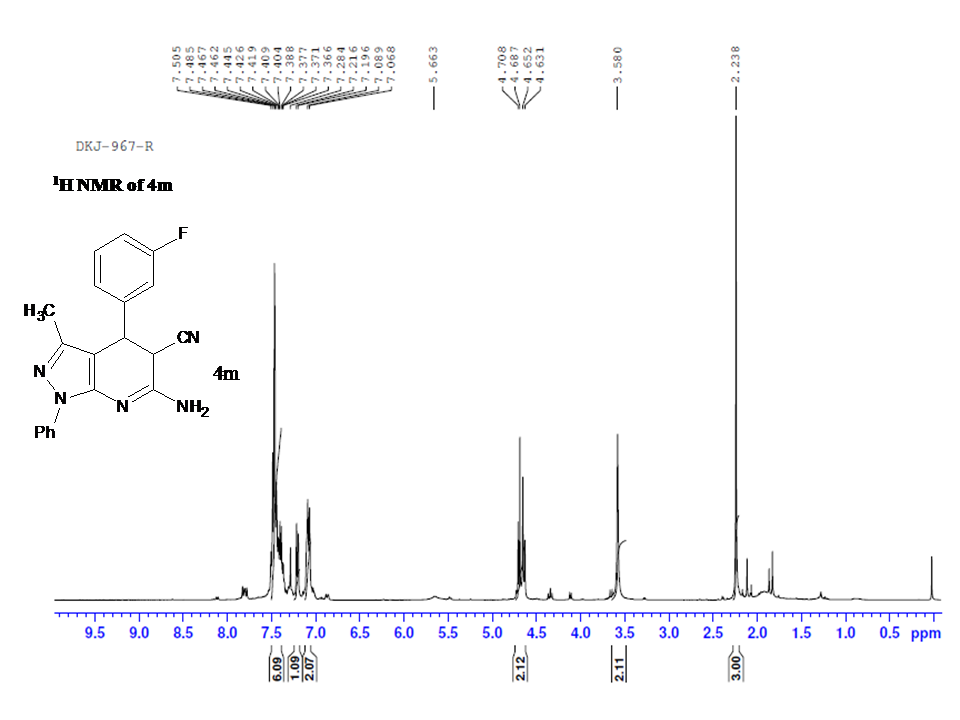


**Figure S41**


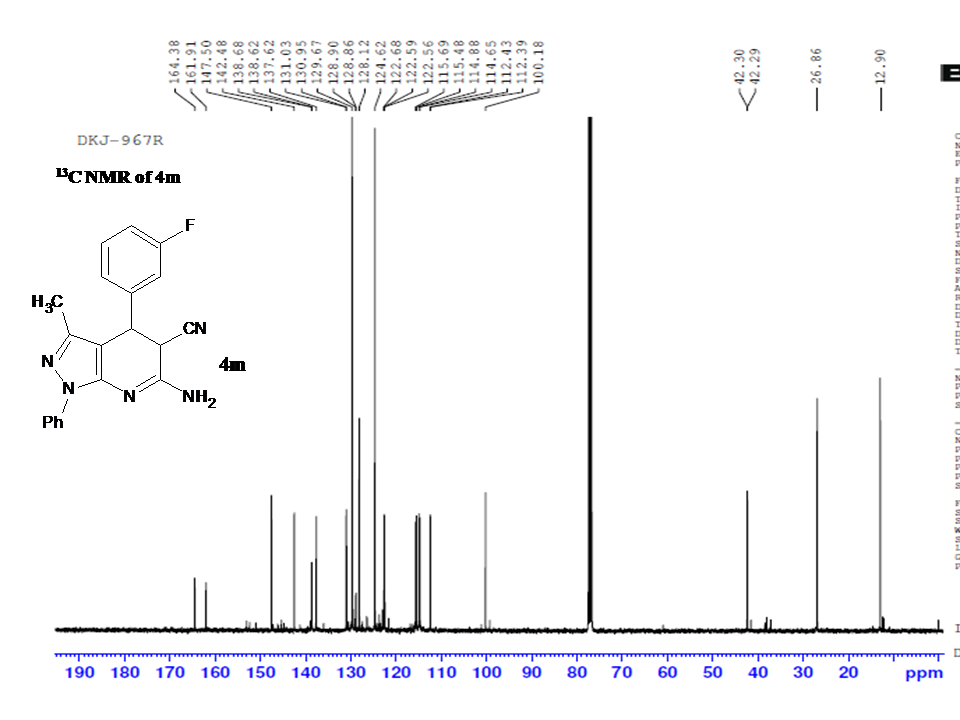


**Figure S42**


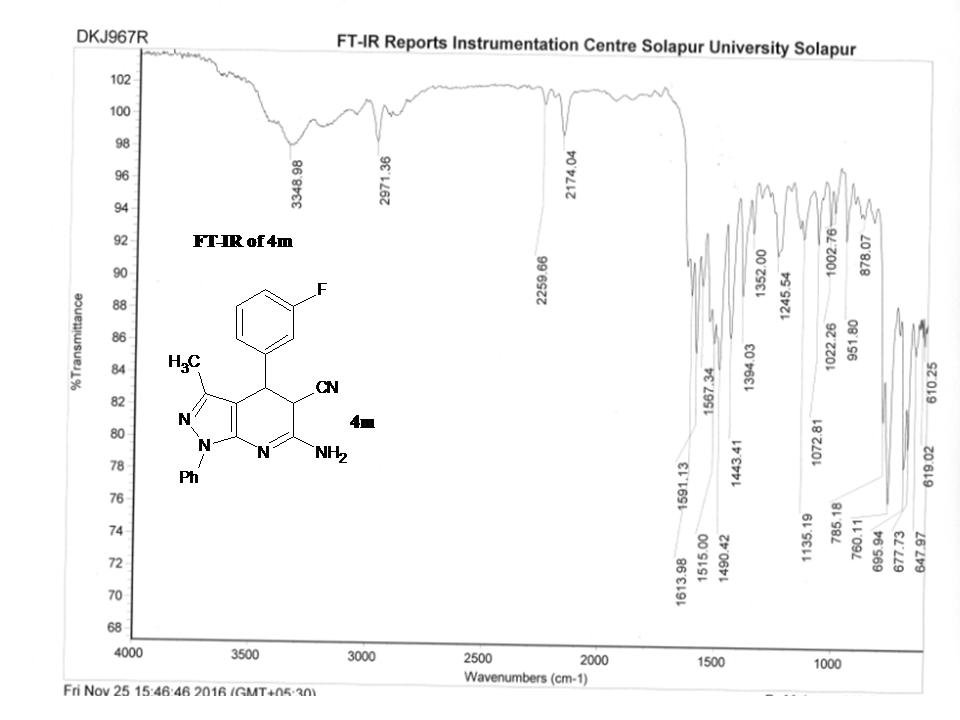


**Figure S43**


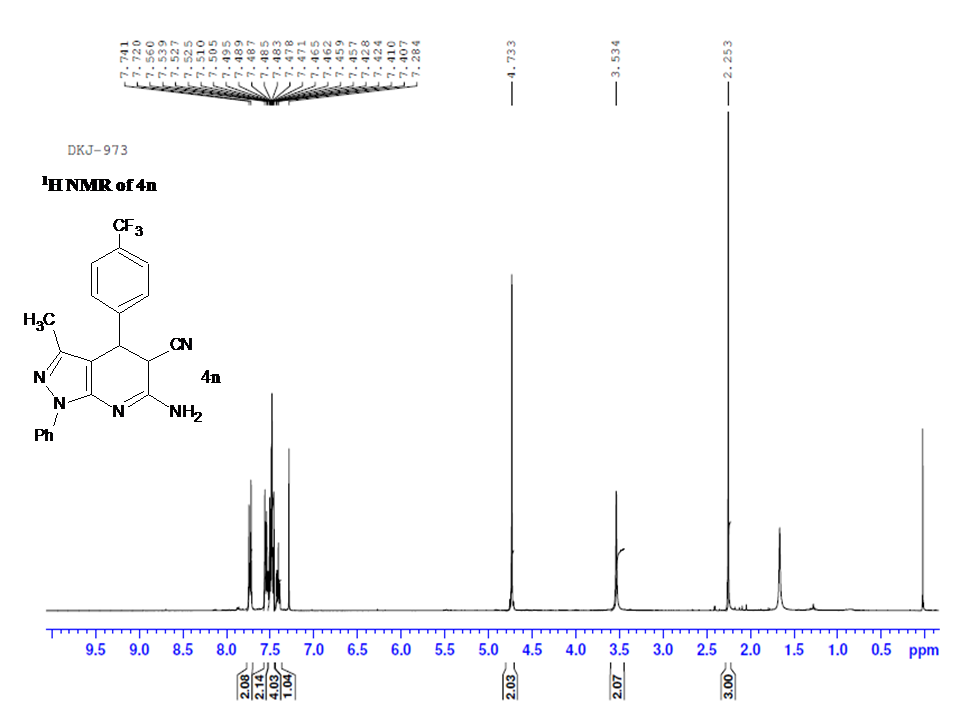


**Figure S44**


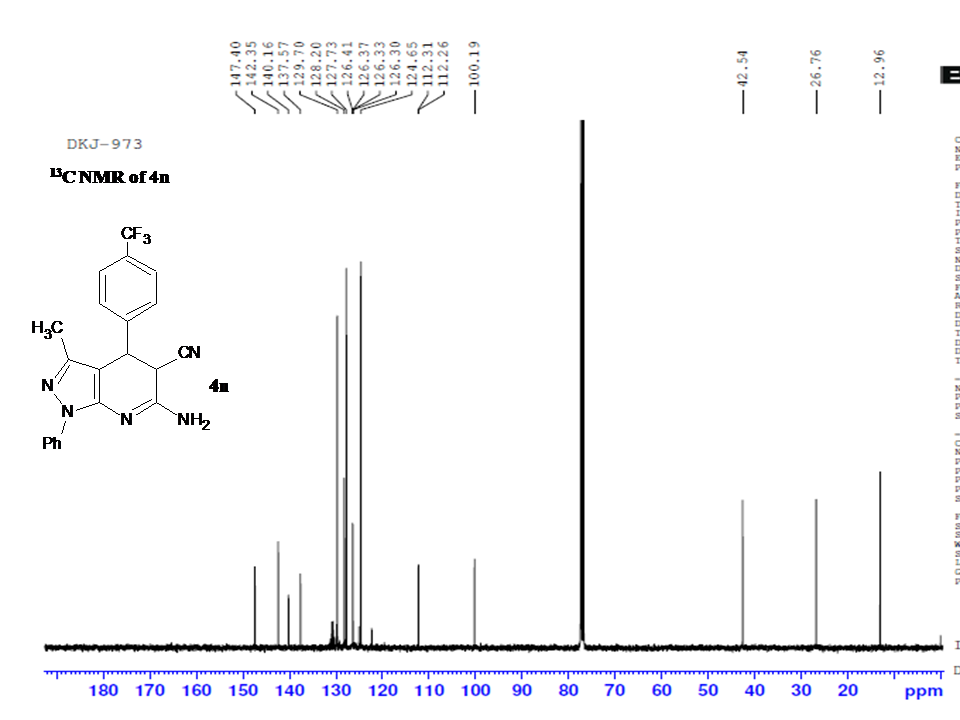


**Figure S45**


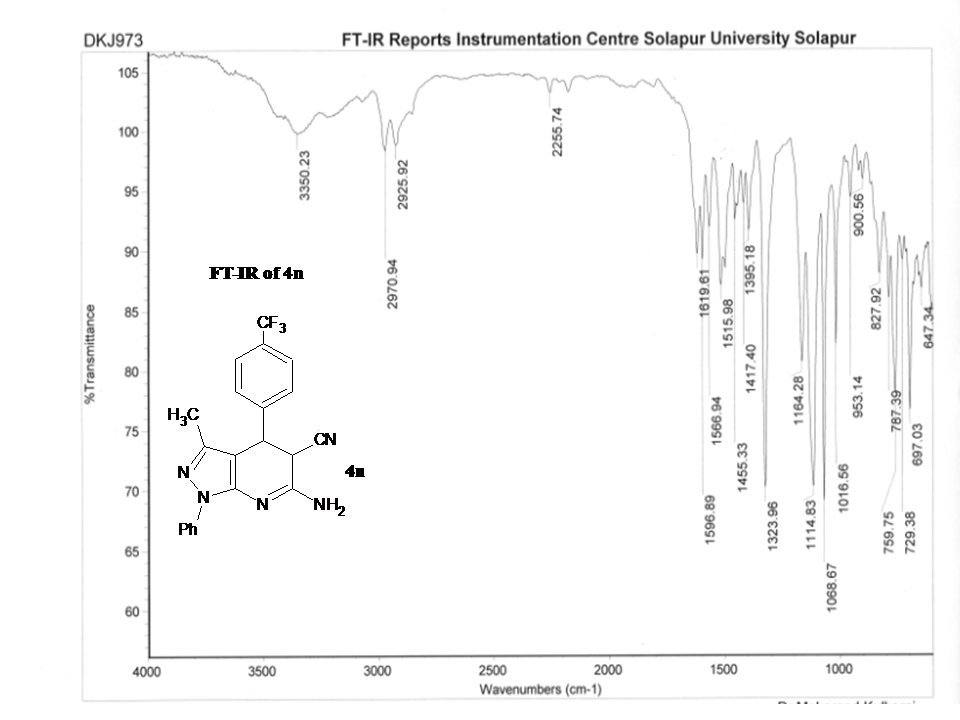


**Figure S46**


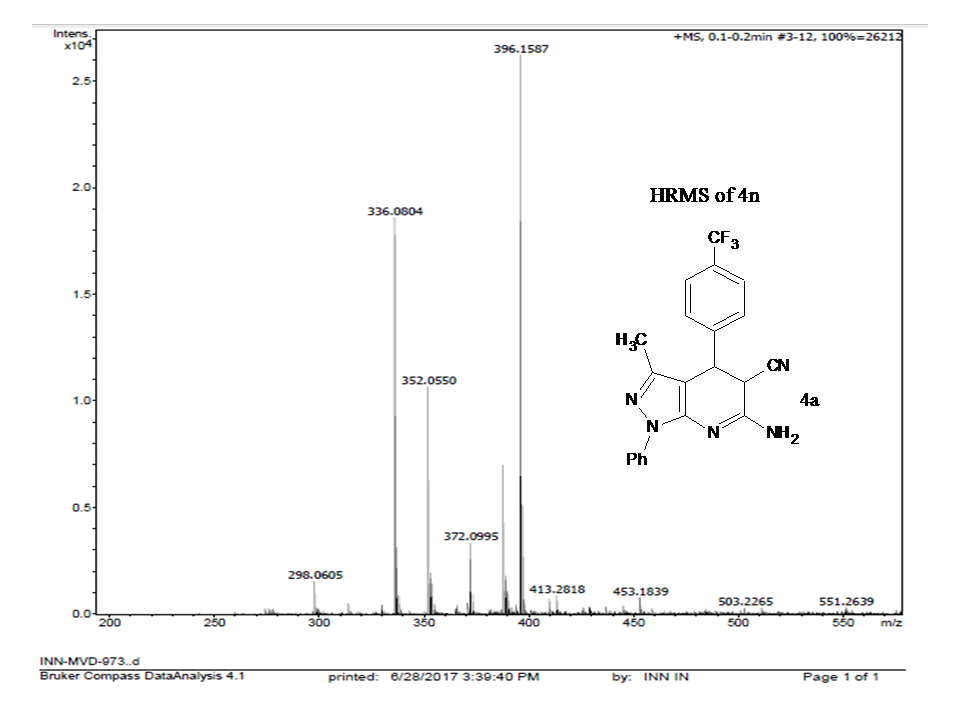


**Figure S47**
